# Supplementary material for: Bonding situation in Be[N(SiMe3)2]2– an experimental and computational study
Source: Royal Society of Chemistry journal article supplement (doi:10.1039/c4cc09732g), 2015-01-01
Supplement: c4cc09732g1.pdf [file c4cc09732g1.pdf]

# Supporting Information

## **Bonding Situation in Be[N(SiMe<sub>3</sub>)<sub>2</sub>]<sub>2</sub> - An Experimental and Computational Study**

*D. Naglav, A. Neumann, D. Bläser, C. Wölper, R. Haack, G. Jansen and S. Schulz\**

## Experimental Section

**General Procedures.** All manipulations were performed in an atmosphere of purified argon using standard Schlenk and glove-box techniques. Toluene, Diethylether and hexane were dried using mBraun Solvent Purification System. Deuterated solvents were dried over activated molecular sieves (4 Å) and degassed prior to use. Anhydrous nature of the solvents were verified by Karl Fischer titration.

**Chemicals.** KN(Tms)<sub>2</sub> (Sigma Aldrich), BeCl<sub>2</sub> was prepared by burning Be-metal in Chlorine at temperatures > 500 °C.

**Instrumentation.** <sup>1</sup>H (300 MHz), <sup>9</sup>Be (42.2 MHz), <sup>13</sup>C{<sup>1</sup>H} (75.5 MHz), <sup>14</sup>N (21.7 MHz) and <sup>29</sup>Si (59.6 MHz) NMR ( $\delta$  in ppm) spectra were recorded using a Bruker Avance DPX-300 spectrometer and the spectra were referenced to the trace of respective protonated solvent impurities present in the deuterated solvents. In case of <sup>9</sup>Be the spectra were referenced externally to a 0.43 M solution of BeSO<sub>4</sub> in D<sub>2</sub>O. For <sup>14</sup>N the spectra were referenced externally to a 90 % solution of H<sub>3</sub>C-NO<sub>2</sub> in CDCl<sub>3</sub>. The <sup>29</sup>Si spectra were referenced to an external standard of neat Si(CH<sub>3</sub>)<sub>4</sub> (TMS). IR spectra were measured in an ALPHA-T FT-IR spectrometer equipped with a single reflection ATR sampling module. The spectrometer was placed in a glovebox to allow measurement in inert gas atmosphere.

### Synthesis of Be[N(SiMe<sub>3</sub>)<sub>2</sub>]<sub>2</sub> (**1**)<sup>[1]</sup>

A mixture of BeCl<sub>2</sub> (3.996 g, 50 mmol) and KN(Tms)<sub>2</sub> (19.948 g, 100 mmol) was suspended in 100 mL of toluene at ambient temperature and 100 mL of Et<sub>2</sub>O were added. The solution was heated to reflux for 12h and then filtered through a P4 glass frit, yielding in a clear yellow solution. All volatiles were removed in vacuo and the resulting viscous residue was distilled at 0.1 mbar. The product was collected as colourless viscous liquid **1** with a boiling point of 75 °C. Yield: 14.15 g (43 mmol, 86 %). mp: 8 °C. IR (neat):  $\nu$  2951 (m), 1312 (m), 1249 (m), 947 (s), 816 (s), 755 (s), 679 (m), 616 (m), 402 (m) cm<sup>-1</sup>. <sup>1</sup>H NMR (C<sub>6</sub>D<sub>6</sub>, 300 MHz):  $\delta$  0.20 (s, 72 H, Be(N(SiCH<sub>3</sub>)<sub>2</sub>)<sub>2</sub>). <sup>9</sup>Be (C<sub>6</sub>D<sub>6</sub>, 42.2 MHz):  $\delta$  12.29 (s, Be(N(SiCH<sub>3</sub>)<sub>2</sub>)<sub>2</sub>). <sup>13</sup>C NMR (C<sub>6</sub>D<sub>6</sub>, 75.5 MHz):  $\delta$  4.40 (Be(N(SiCH<sub>3</sub>)<sub>2</sub>)<sub>2</sub>). <sup>14</sup>N (C<sub>6</sub>D<sub>6</sub>, 21.7 MHz): -326.40 (s, Be(N(SiCH<sub>3</sub>)<sub>2</sub>)<sub>2</sub>). <sup>29</sup>Si (C<sub>6</sub>D<sub>6</sub>, 59.6 MHz): -1.85 (s, Be(N(SiCH<sub>3</sub>)<sub>2</sub>)<sub>2</sub>). <sup>1</sup>H NMR (Tol-*d*<sub>8</sub>, 300 MHz):  $\delta$  0.16 (s, 72 H, Be(N(SiCH<sub>3</sub>)<sub>2</sub>)<sub>2</sub>). <sup>9</sup>Be (Tol-*d*<sub>8</sub>, 42.2 MHz):  $\delta$  12.41 (s, Be(N(SiCH<sub>3</sub>)<sub>2</sub>)<sub>2</sub>). <sup>13</sup>C NMR (Tol-*d*<sub>8</sub>, 75.5 MHz):  $\delta$  4.41 (Be(N(SiCH<sub>3</sub>)<sub>2</sub>)<sub>2</sub>). <sup>14</sup>N (Tol-*d*<sub>8</sub>, 21.7 MHz): -326.48 (s, Be(N(SiCH<sub>3</sub>)<sub>2</sub>)<sub>2</sub>). <sup>29</sup>Si (Tol-*d*<sub>8</sub>, 59.6 MHz): -1.87 (s, Be(N(SiCH<sub>3</sub>)<sub>2</sub>)<sub>2</sub>). <sup>1</sup>H NMR (THF-*d*<sub>8</sub>, 300 MHz):  $\delta$  0.05 (s, 72 H, Be(N(SiCH<sub>3</sub>)<sub>2</sub>)<sub>2</sub>). <sup>9</sup>Be (THF-*d*<sub>8</sub>, 42.2 MHz):  $\delta$  9.55 (s, Be(N(SiCH<sub>3</sub>)<sub>2</sub>)<sub>2</sub>). <sup>13</sup>C NMR (THF-*d*<sub>8</sub>, 75.5

MHz):  $\delta$  5.64 (Be(N(SiCH<sub>3</sub>)<sub>2</sub>)<sub>2</sub>). <sup>14</sup>N (THF-*d*<sub>8</sub>, 21.7 MHz): -337.31 (s, Be(N(SiCH<sub>3</sub>)<sub>2</sub>)<sub>2</sub>). <sup>29</sup>Si (THF-*d*<sub>8</sub>, 59.6 MHz): -5.80 (s, Be(N(SiCH<sub>3</sub>)<sub>2</sub>)<sub>2</sub>).

**Overview of the chemical shifts of <sup>1</sup>H, <sup>9</sup>Be, <sup>13</sup>C, <sup>14</sup>N and <sup>29</sup>Si (ppm) in Be(N(SiMe<sub>3</sub>)<sub>2</sub>)<sub>2</sub> in dependence on different solvents**

|                               | <sup>1</sup> H | <sup>9</sup> Be | <sup>13</sup> C | <sup>14</sup> N | <sup>29</sup> Si |
|-------------------------------|----------------|-----------------|-----------------|-----------------|------------------|
| C <sub>6</sub> D <sub>6</sub> | 0.20           | 12.29           | 4.40            | -326.40         | -1.85            |
| Tol- <i>d</i> <sub>8</sub>    | 0.16           | 12.41           | 4.41            | -326.48         | -1.87            |
| THF- <i>d</i> <sub>8</sub>    | 0.05           | 9.55            | 5.64            | -337.31         | -5.80            |

**<sup>1</sup>H-NMR: Be(N(Tms)<sub>2</sub>)<sub>2</sub> in C<sub>6</sub>D<sub>6</sub>**

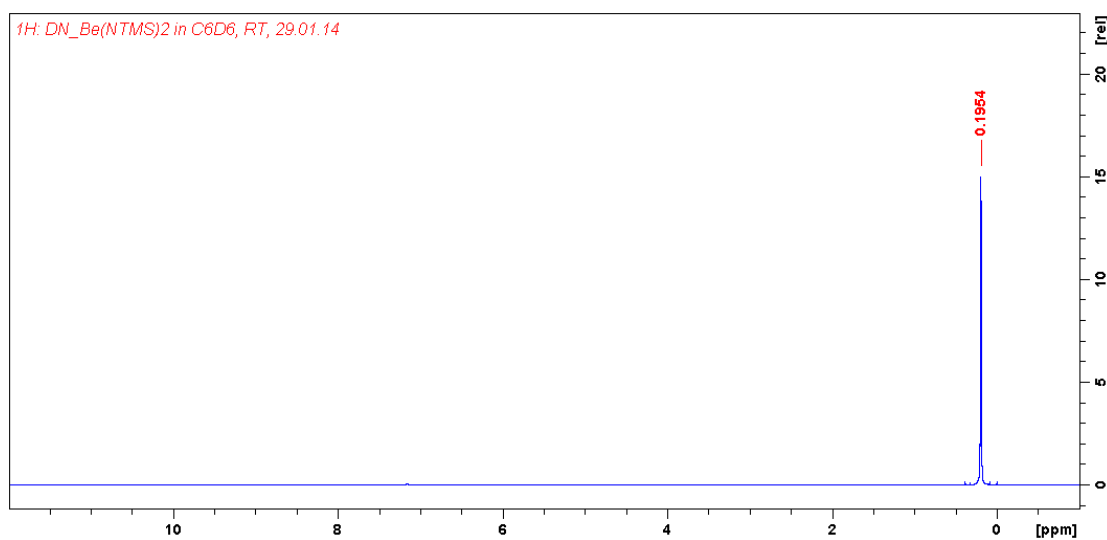

**$^9\text{Be}$ -NMR:  $\text{Be}(\text{N}(\text{Tms})_2)_2$  in  $\text{C}_6\text{D}_6$**

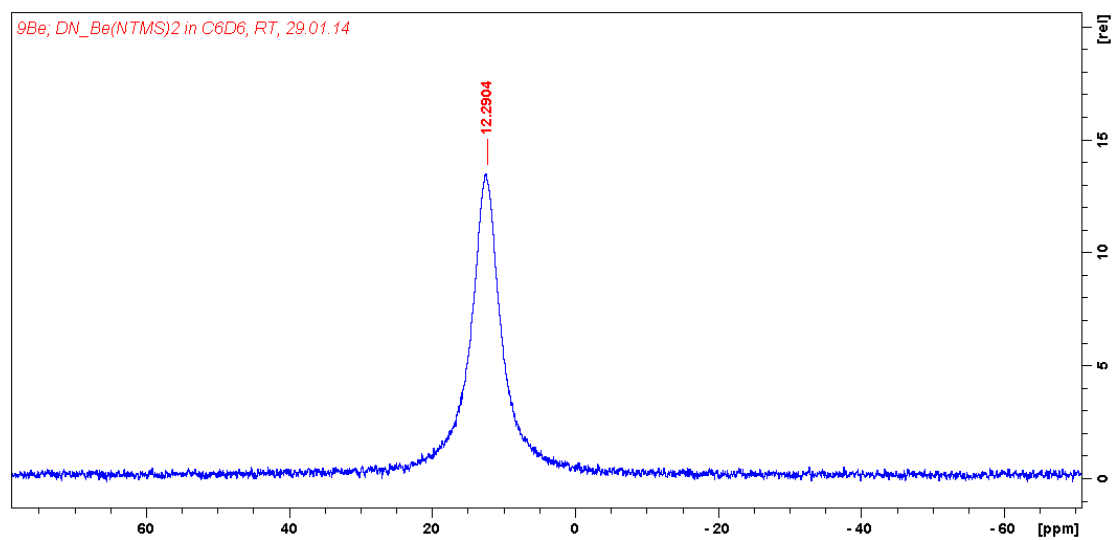

**$^{13}\text{C}$ -NMR:  $\text{Be}(\text{N}(\text{Tms})_2)_2$  in  $\text{C}_6\text{D}_6$**

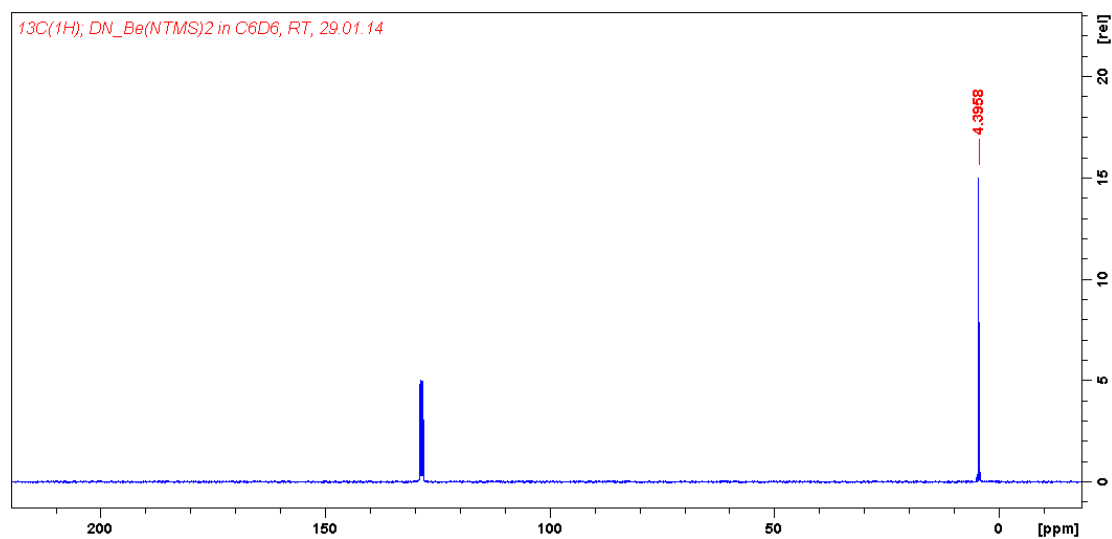

**$^{14}\text{N}$ -NMR:  $\text{Be}(\text{N}(\text{Tms})_2)_2$  in  $\text{C}_6\text{D}_6$**

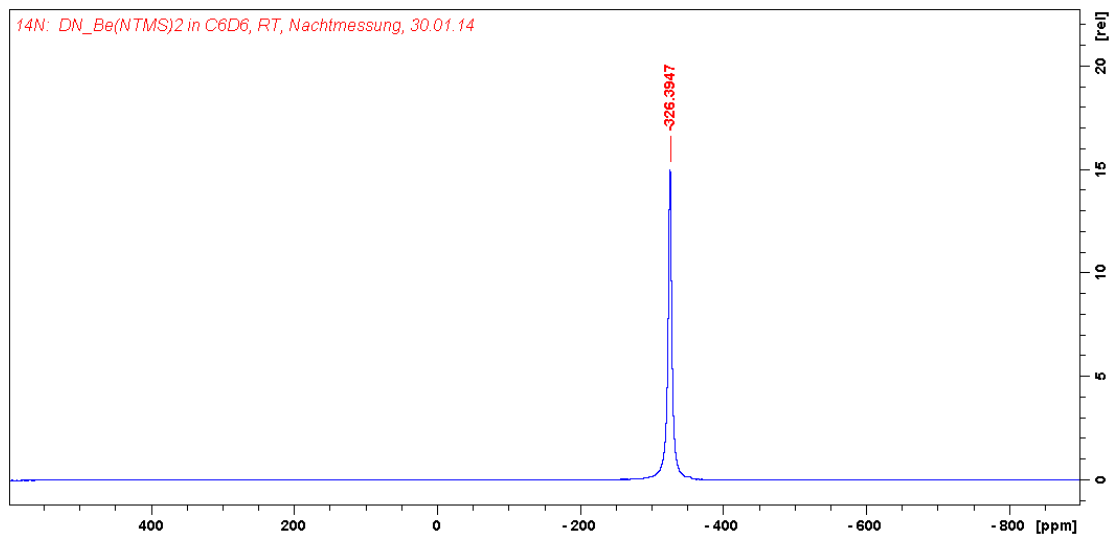

**$^{29}\text{Si}$ -NMR:  $\text{Be}(\text{N}(\text{Tms})_2)_2$  in  $\text{C}_6\text{D}_6$**

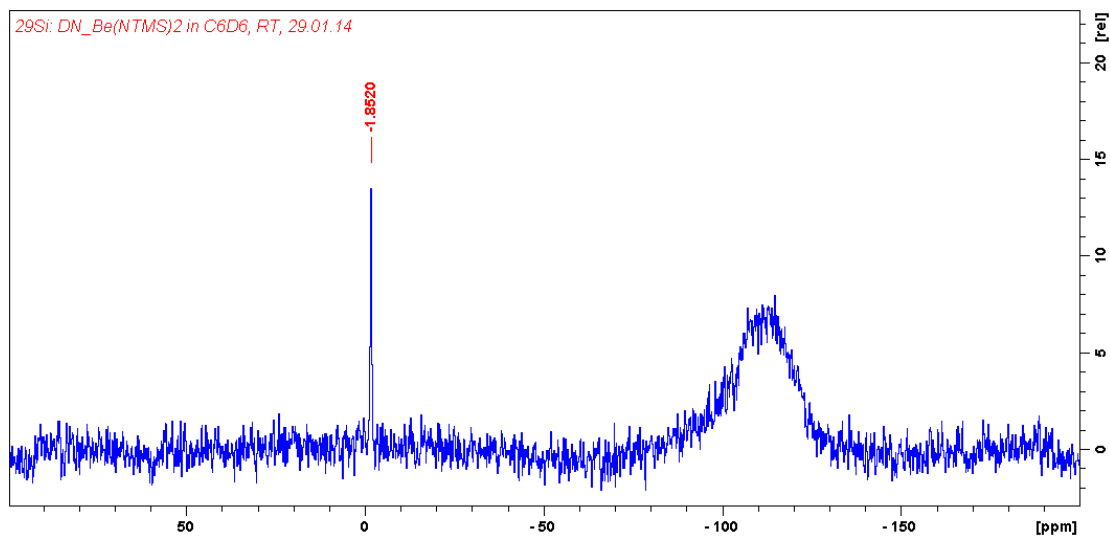

# $^1\text{H-NMR}$ : $\text{Be}(\text{N}(\text{Tms})_2)_2$ in $\text{THF-}d_8$

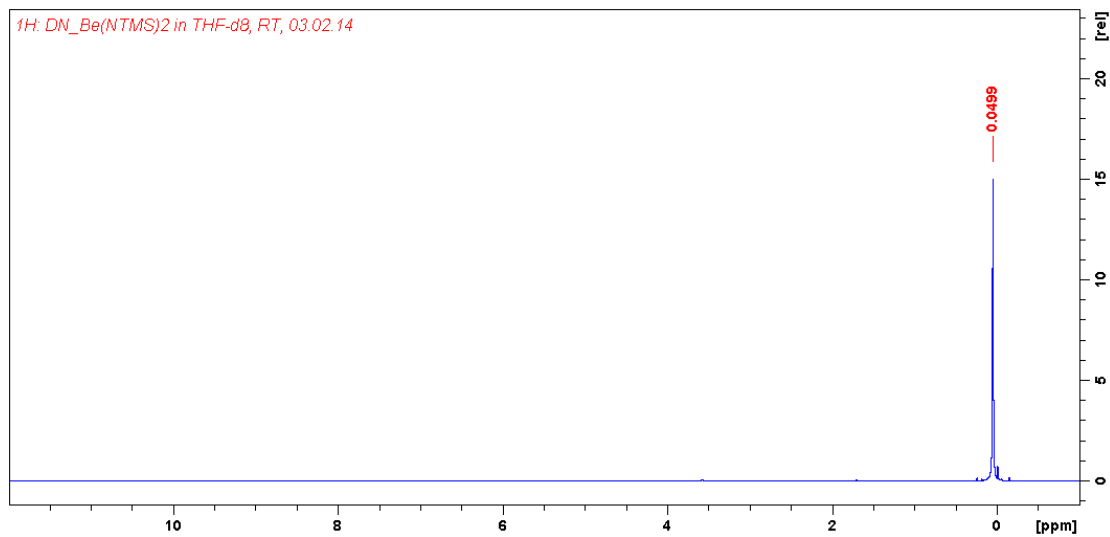

# $^9\text{Be-NMR}$ : $\text{Be}(\text{N}(\text{Tms})_2)_2$ in $\text{THF-}d_8$

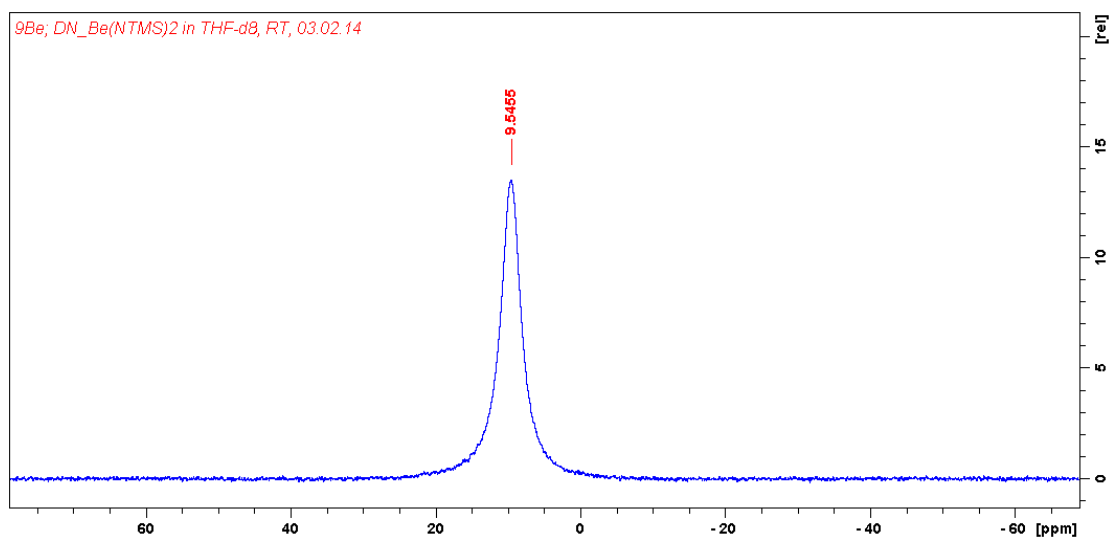

**$^{13}\text{C}$ -NMR:  $\text{Be}(\text{N}(\text{Tms})_2)_2$  in  $\text{THF-}d_8$**

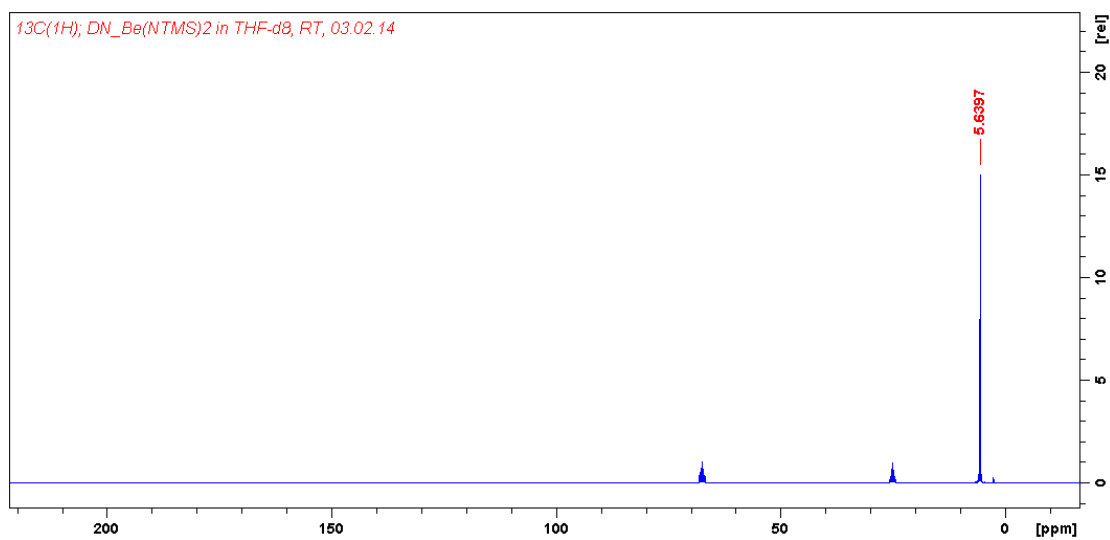

**$^{14}\text{N}$ -NMR:  $\text{Be}(\text{N}(\text{Tms})_2)_2$  in  $\text{THF-}d_8$**

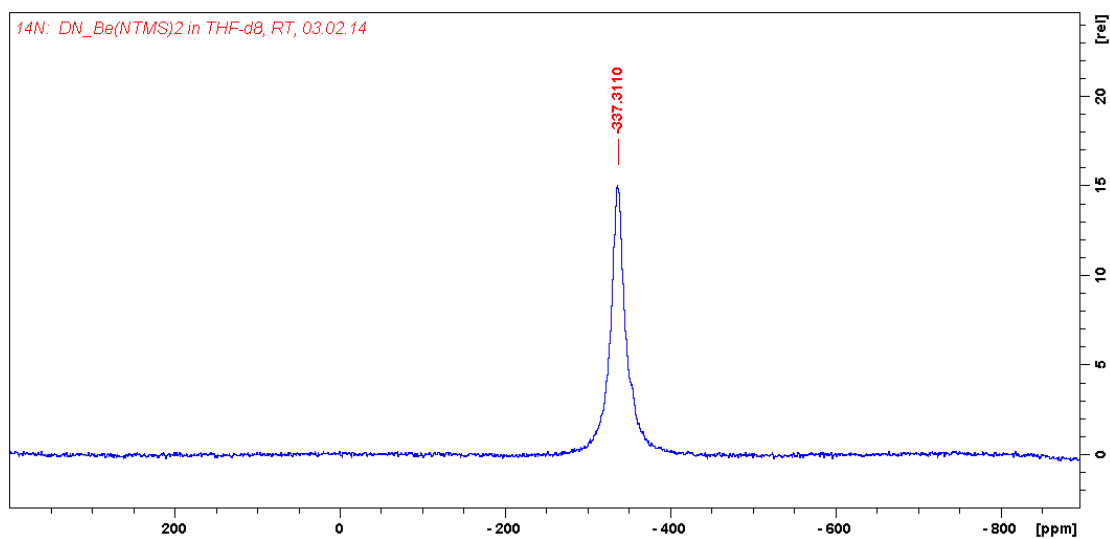

**$^{29}\text{Si}$ -NMR:  $\text{Be}(\text{N}(\text{Tms})_2)_2$  in  $\text{THF-}d_8$**

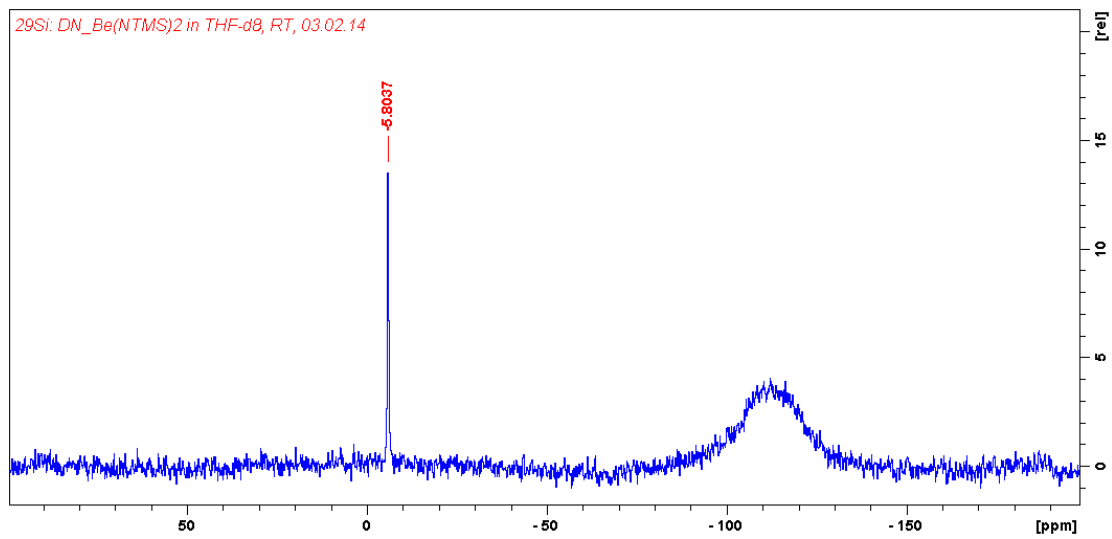

**$^1\text{H}$ -NMR:  $\text{Be}(\text{N}(\text{Tms})_2)_2$  in  $\text{Tol-}d_8$**

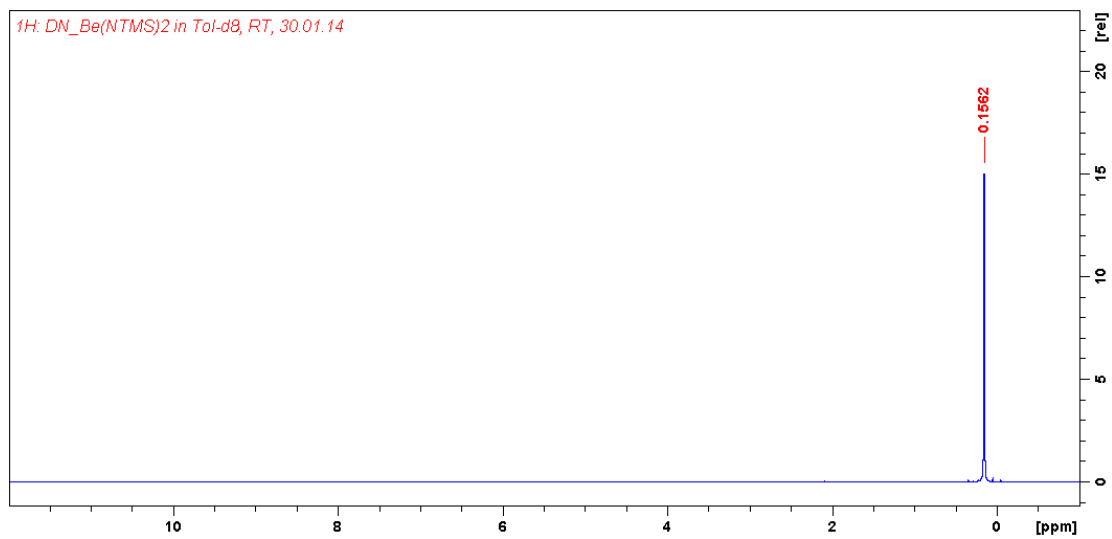



**$^9\text{Be}$ -NMR:  $\text{Be}(\text{N}(\text{Tms})_2)_2$  in  $\text{Tol-}d_8$**

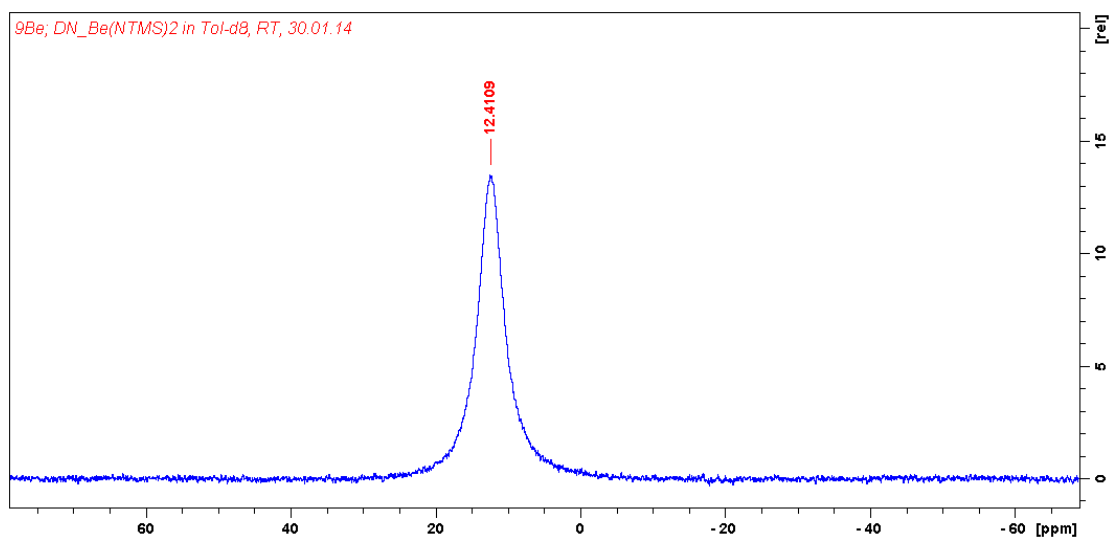

**$^{13}\text{C}$ -NMR:  $\text{Be}(\text{N}(\text{Tms})_2)_2$  in  $\text{Tol-}d_8$**

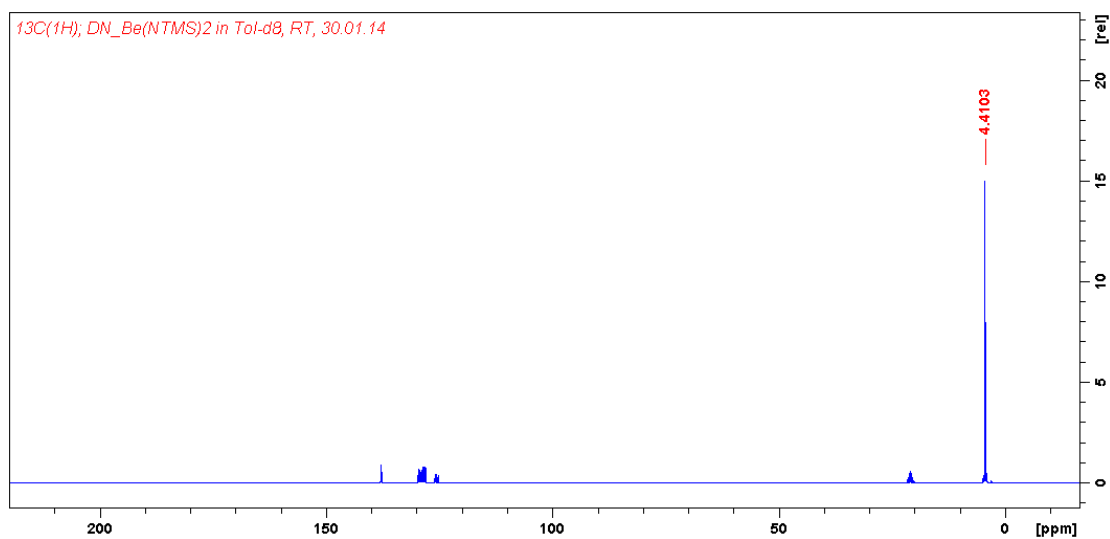

**$^{14}\text{N}$ -NMR:  $\text{Be}(\text{N}(\text{Tms})_2)_2$  in  $\text{Tol-}d_8$**

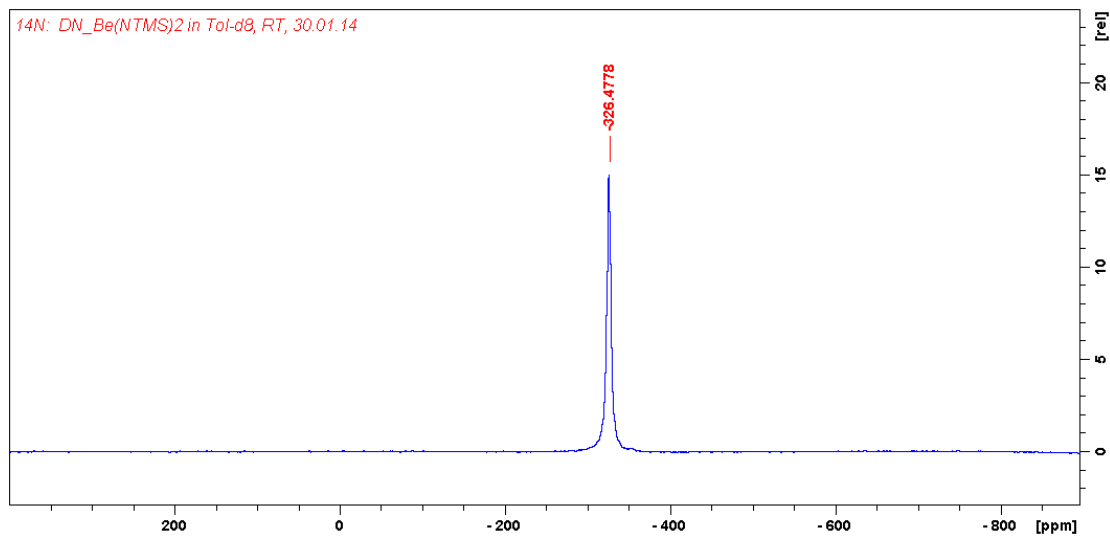

**$^{29}\text{Si}$ -NMR:  $\text{Be}(\text{N}(\text{Tms})_2)_2$  in  $\text{Tol-}d_8$**

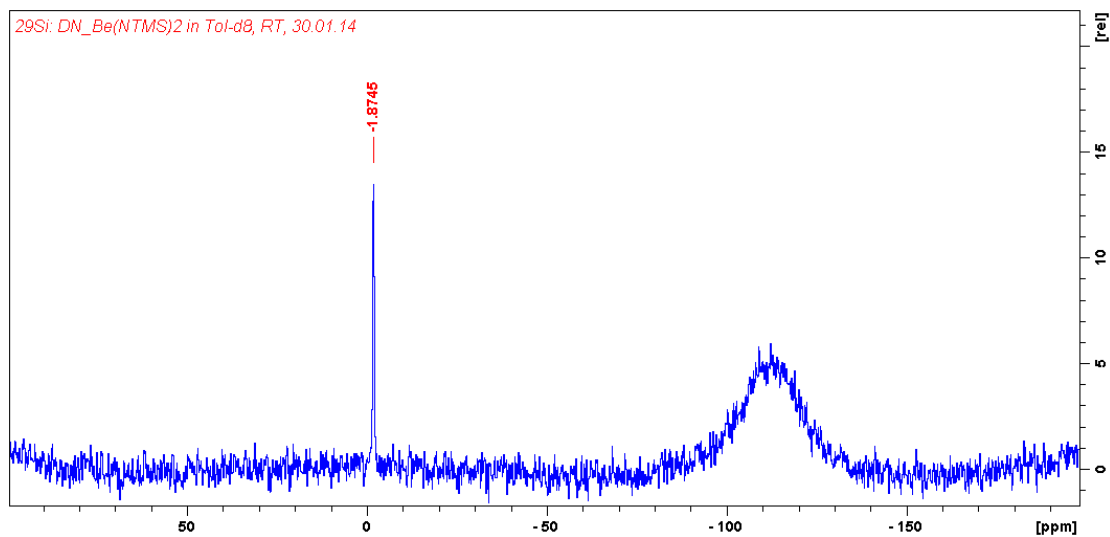

### Temperature-dependant $^1\text{H}$ -NMR: $\text{Be}(\text{N}(\text{Tms})_2)_2$ in $\text{Tol-}d_8$

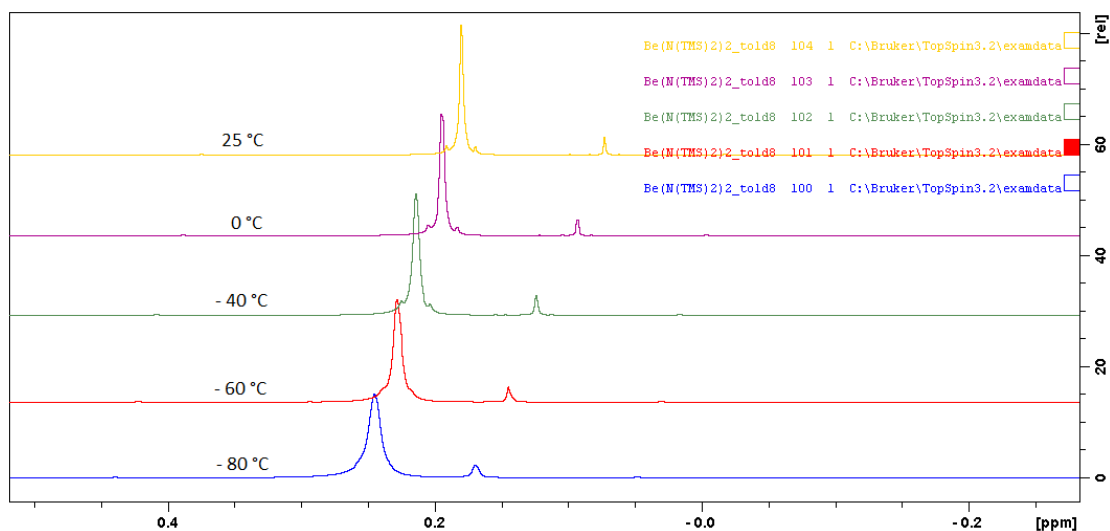

### Temperature-dependant $^9\text{Be}$ -NMR: $\text{Be}(\text{N}(\text{Tms})_2)_2$ in $\text{Tol-}d_8$

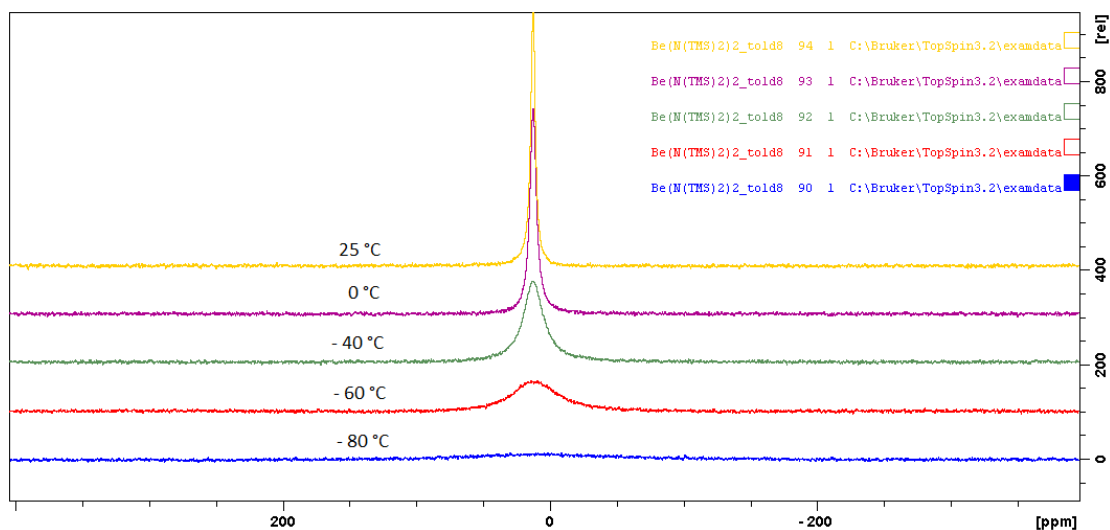

### Temperature-dependant $^{13}\text{C}$ -NMR: $\text{Be}(\text{N}(\text{Tms})_2)_2$ in $\text{Tol-}d_8$

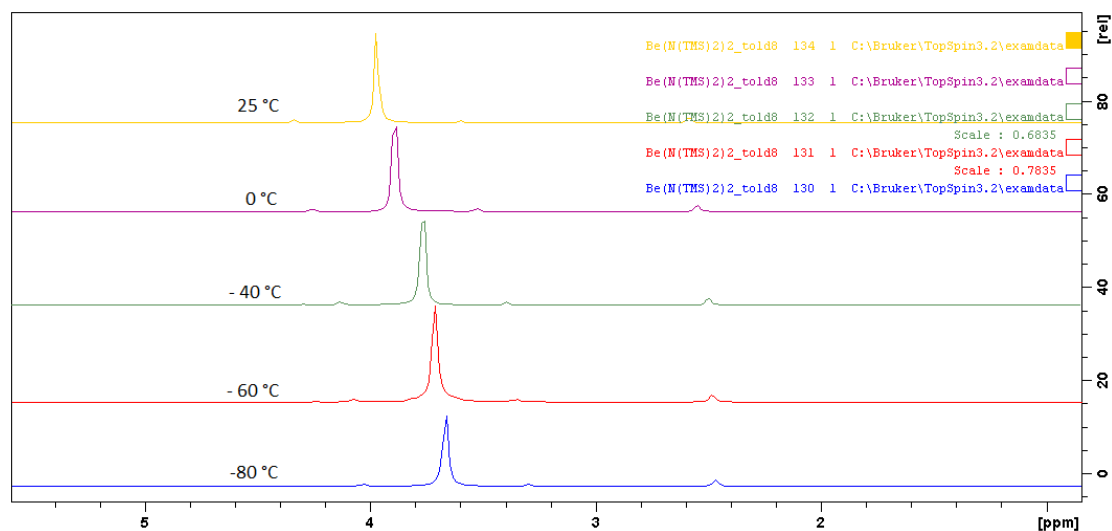

### Temperature-dependant $^{14}\text{N}$ -NMR: $\text{Be}(\text{N}(\text{Tms})_2)_2$ in $\text{Tol-}d_8$

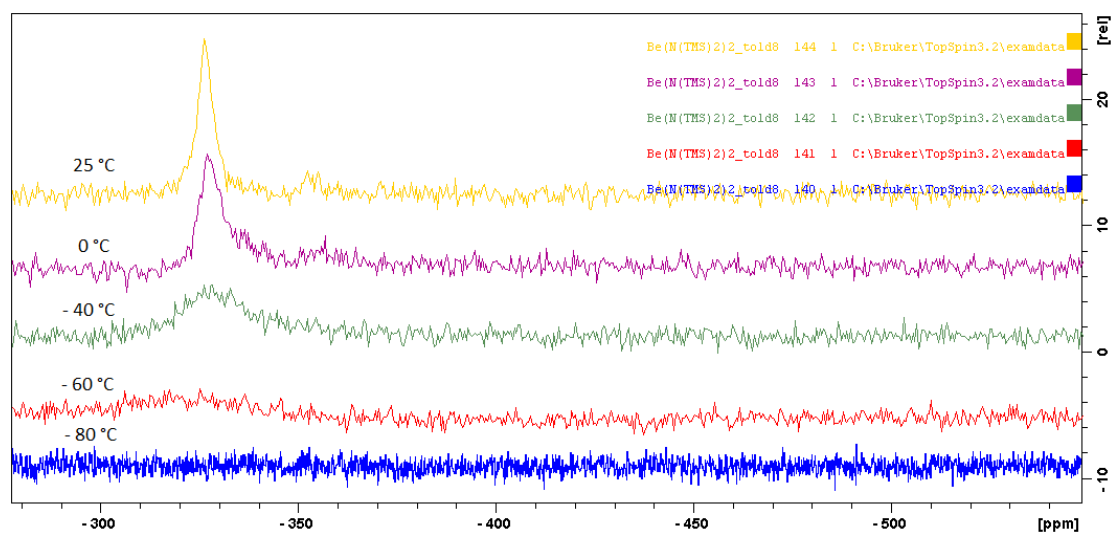

## Temperature-dependant $^{29}\text{Si}$ -NMR: $\text{Be}(\text{N}(\text{Tms})_2)_2$ in $\text{Tol-}d_8$

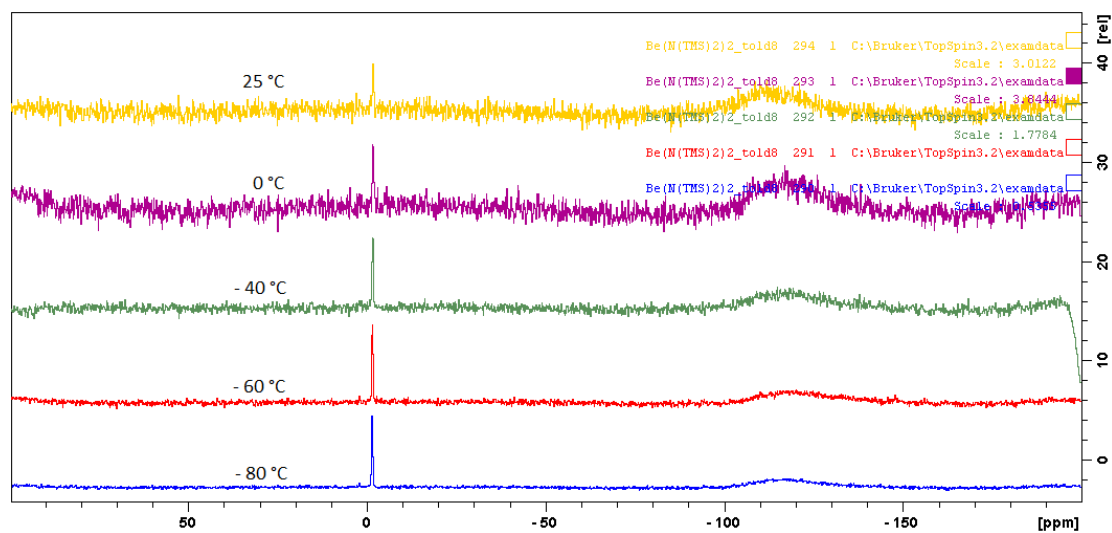

## IR spectrum of $\text{Be}(\text{N}(\text{SiMe}_3)_2)_2$

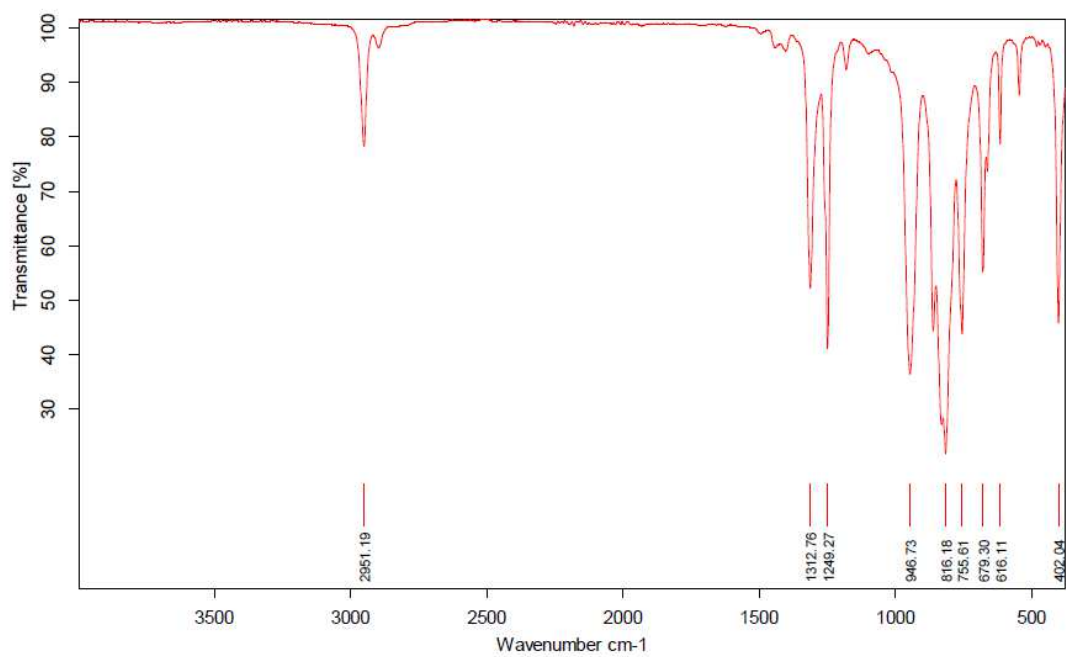

### Single-crystal X-ray analysis.

The crystal were mounted on nylon loops in inert oil. Data were collected on a Bruker AXS D8 Kappa diffractometer with APEX2 detector (mono-chromated  $\text{Mo}_{K\alpha}$  radiation,  $\lambda = 0.71073 \text{ \AA}$ ) at 100 K. The structure was solved by Direct Methods (SHELXS-97)<sup>[2]</sup> and refined anisotropically by full-matrix least-squares on  $F^2$  (SHELXL-97).<sup>[3]</sup> Absorption corrections was performed semi-empirically from equivalent reflections on basis of multi-scans (Bruker AXS APEX2. Hydrogen atoms were refined rigid methyl groups. CCDC 1003578 (**1**) contains the supplementary crystallographic data for this paper. These data can be obtained free of charge from The Cambridge Crystallographic Data Centre via [www.ccdc.cam.ac.uk/data\\_request/cif](http://www.ccdc.cam.ac.uk/data_request/cif).

Table 1: Crystal structure data of **1**

|                                         |                                                             |
|-----------------------------------------|-------------------------------------------------------------|
| <b>Identification code</b>              | <b>dnp_035m</b>                                             |
| Empirical formula                       | $\text{C}_{12} \text{H}_{36} \text{Be N}_2 \text{Si}_4$     |
| Formula weight                          | 329.80                                                      |
| Density (calculated)                    | $0.966 \text{ g} \cdot \text{cm}^{-3}$                      |
| $F(000)$                                | 728                                                         |
| Temperature                             | 100(1) K                                                    |
| Crystal size                            | $0.300 \times 0.300 \times 0.300 \text{ mm}$                |
| Crystal colour                          | colourless                                                  |
| Crystal description                     | cylindric                                                   |
| Wavelength                              | $0.71073 \text{ \AA}$                                       |
| Crystal system                          | monoclinic                                                  |
| Space group                             | $P2_1/n$                                                    |
| Unit cell dimensions                    |                                                             |
| $a$ [ $\text{\AA}$ ]                    | 9.8756(5)                                                   |
| $b$ [ $\text{\AA}$ ]                    | 16.6972(8)                                                  |
| $c$ [ $\text{\AA}$ ]                    | 14.5875(7)                                                  |
| $\alpha$ [ $^\circ$ ]                   | 90                                                          |
| $\beta$ [ $^\circ$ ]                    | 109.492(2)                                                  |
| $\gamma$ [ $^\circ$ ]                   | 90                                                          |
| Volume                                  | $2267.54(19) \text{ \AA}^3$                                 |
| $Z$                                     | 4                                                           |
| Cell measurement reflections used       | 38140                                                       |
| Cell measurement $\theta$ min/max       | $2.19^\circ/31.54^\circ$                                    |
| Diffractometer control software         | BRUKER D8 KAPPA APEX 2 Vers. 3.0-2009                       |
| Diffractometer measurement device       | Bruker D8 KAPPA series II with APEX II area detector system |
| Diffractometer measurement method       | Data collection strategy APEX 2/COSMO                       |
| $\theta$ range for data collection      | $1.919^\circ - 31.596^\circ$                                |
| Completeness to $\theta = 25.242^\circ$ | 99.2%                                                       |
| Index ranges                            | $-14 \leq h \leq 14$                                        |
|                                         | $-24 \leq k \leq 24$                                        |
|                                         | $-21 \leq l \leq 21$                                        |

|                                           |                                                              |
|-------------------------------------------|--------------------------------------------------------------|
| Computing data reduction                  | BRUKER D8 KAPPA APEX 2 Vers. 3.0-2009                        |
| Absorption coefficient                    | 0.255 mm <sup>-1</sup>                                       |
| Absorption correction                     | Semi-empirical from equivalents                              |
| Computation absorption correction         | BRUKER AXS SMART APEX 2 Vers. 3.0-2009                       |
| Max./min. Transmission                    | 0.75/0.64                                                    |
| $R_{\text{merg}}$ before/after correction | 0.1095 / 0.0785                                              |
| Computing structure solution              | BRUKER D8 KAPPA APEX 2 Vers. 3.0-2009                        |
| Computing structure refinement            | BRUKER AXS Inc. 2013 Vers. 2013/4                            |
| Refinement method                         | Full-matrix least-squares on $F^2$                           |
| Reflections collected                     | 58472                                                        |
| Independent reflections                   | 7557                                                         |
| $R_{\text{int}}$                          | 0.0507                                                       |
| Data                                      | 6284                                                         |
| Restraints                                | 0                                                            |
| Parameter                                 | 172                                                          |
| Goof                                      | 1.024                                                        |
| Weighting details                         | $w = 1/[\sigma^2(F_{\text{obs}}^2) + (0.0595P)^2 + 1.6098P]$ |
|                                           | where $P = (F_{\text{obs}}^2 + 2F_{\text{calc}}^2)/3$        |
| $R_1 [I > 2\sigma(I)]$                    | 0.0471                                                       |
| $wR_2 [I > 2\sigma(I)]$                   | 0.1213                                                       |
| $R_1$ [all data]                          | 0.0588                                                       |
| $wR_2$ [all data]                         | 0.1326                                                       |
| Absolute structure parameter              |                                                              |
| Largest diff. peak and hole               | 0.766/-0.692                                                 |

Table 2: Atomic coordinates ( $\times 10^4$ ) and equivalent isotropic displacement parameters ( $\text{\AA}^2 \times 10^3$ ) for **1**.  $U_{\text{eq}}$  is defined as one third of the trace of the orthogonalized  $U_{ij}$  tensor.

|        | <i>x</i> | <i>y</i> | <i>z</i> | $U_{\text{eq}}$ |
|--------|----------|----------|----------|-----------------|
| Si(1)  | 7446(1)  | 2350(1)  | 1593(1)  | 26(1)           |
| Si(2)  | 4843(1)  | 3481(1)  | 1286(1)  | 31(1)           |
| Si(3)  | 2942(1)  | 673(1)   | 960(1)   | 24(1)           |
| Si(4)  | 4191(1)  | 998(1)   | 3172(1)  | 25(1)           |
| N(1)   | 5730(1)  | 2577(1)  | 1575(1)  | 22(1)           |
| N(2)   | 4011(1)  | 1187(1)  | 1972(1)  | 22(1)           |
| Be(1)  | 4881(2)  | 1880(1)  | 1786(1)  | 23(1)           |
| C(1)   | 7750(2)  | 1259(1)  | 1855(2)  | 36(1)           |
| H(1A)  | 7638     | 1137     | 2483     | 53              |
| H(1B)  | 8723     | 1116     | 1877     | 53              |
| H(1C)  | 7047     | 950      | 1342     | 53              |
| C(2)   | 8855(2)  | 2904(2)  | 2553(2)  | 64(1)           |
| H(2A)  | 8726     | 3481     | 2431     | 97              |
| H(2B)  | 9805     | 2744     | 2545     | 97              |
| H(2C)  | 8776     | 2781     | 3190     | 97              |
| C(3)   | 7669(3)  | 2566(2)  | 398(2)   | 72(1)           |
| H(3A)  | 6877     | 2321     | -124     | 108             |
| H(3B)  | 8583     | 2343     | 390      | 108             |
| H(3C)  | 7663     | 3146     | 298      | 108             |
| C(4)   | 3080(2)  | 3388(1)  | 1494(2)  | 39(1)           |
| H(4A)  | 2536     | 2940     | 1110     | 59              |
| H(4B)  | 2533     | 3885     | 1295     | 59              |
| H(4C)  | 3249     | 3290     | 2186     | 59              |
| C(5)   | 5875(3)  | 4315(1)  | 2017(3)  | 95(1)           |
| H(5A)  | 6001     | 4225     | 2705     | 142             |
| H(5B)  | 5355     | 4818     | 1802     | 142             |
| H(5C)  | 6818     | 4345     | 1934     | 142             |
| C(6)   | 4427(3)  | 3731(2)  | -39(2)   | 73(1)           |
| H(6A)  | 5326     | 3794     | -178     | 109             |
| H(6B)  | 3879     | 4232     | -189     | 109             |
| H(6C)  | 3859     | 3298     | -440     | 109             |
| C(7)   | 3584(3)  | 922(1)   | -76(1)   | 46(1)           |
| H(7A)  | 3459     | 1497     | -216     | 69              |
| H(7B)  | 3026     | 618      | -653     | 69              |
| H(7C)  | 4603     | 783      | 98       | 69              |
| C(8)   | 1031(2)  | 996(1)   | 612(2)   | 47(1)           |
| H(8A)  | 635      | 827      | 1114     | 71              |
| H(8B)  | 477      | 750      | -11      | 71              |
| H(8C)  | 976      | 1581     | 548      | 71              |
| C(9)   | 3043(2)  | -430(1)  | 1149(1)  | 36(1)           |
| H(9A)  | 4043     | -606     | 1314     | 54              |
| H(9B)  | 2452     | -698     | 552      | 54              |
| H(9C)  | 2688     | -567     | 1682     | 54              |
| C(10)  | 2413(2)  | 832(1)   | 3330(1)  | 37(1)           |
| H(10A) | 1826     | 1316     | 3139     | 55              |
| H(10B) | 2557     | 709      | 4013     | 55              |



|        |         |         |         |       |
|--------|---------|---------|---------|-------|
| H(10C) | 1922    | 383     | 2921    | 55    |
| C(11)  | 5084(2) | 1886(1) | 3911(1) | 39(1) |
| H(11A) | 6004    | 1986    | 3813    | 58    |
| H(11B) | 5252    | 1779    | 4600    | 58    |
| H(11C) | 4464    | 2356    | 3706    | 58    |
| C(12)  | 5342(2) | 101(1)  | 3643(1) | 42(1) |
| H(12A) | 4871    | -376    | 3286    | 63    |
| H(12B) | 5485    | 33      | 4336    | 63    |
| H(12C) | 6275    | 176     | 3554    | 63    |

Table 3: Anisotropic displacement parameters ( $\text{\AA}^2 \times 10^3$ ) for **1**. The anisotropic displacement factor exponent takes the form:  $-2\pi^2[h^2a^*U_{11} + \dots + 2hka^*b^*U_{12}]$

|       | $U_{11}$ | $U_{22}$ | $U_{33}$ | $U_{23}$ | $U_{13}$ | $U_{12}$ |
|-------|----------|----------|----------|----------|----------|----------|
| Si(1) | 24(1)    | 21(1)    | 38(1)    | 6(1)     | 16(1)    | 2(1)     |
| Si(2) | 23(1)    | 17(1)    | 49(1)    | 0(1)     | 9(1)     | 1(1)     |
| Si(3) | 22(1)    | 22(1)    | 27(1)    | -3(1)    | 6(1)     | -2(1)    |
| Si(4) | 24(1)    | 30(1)    | 25(1)    | 0(1)     | 13(1)    | -1(1)    |
| N(1)  | 21(1)    | 17(1)    | 27(1)    | 0(1)     | 9(1)     | 0(1)     |
| N(2)  | 21(1)    | 22(1)    | 24(1)    | -1(1)    | 10(1)    | -2(1)    |
| Be(1) | 22(1)    | 21(1)    | 26(1)    | -1(1)    | 10(1)    | -1(1)    |
| C(1)  | 33(1)    | 25(1)    | 54(1)    | 9(1)     | 21(1)    | 8(1)     |
| C(2)  | 26(1)    | 46(1)    | 107(2)   | -15(1)   | 3(1)     | -4(1)    |
| C(3)  | 83(2)    | 79(2)    | 85(2)    | 51(2)    | 69(2)    | 47(1)    |
| C(4)  | 30(1)    | 36(1)    | 54(1)    | 0(1)     | 17(1)    | 9(1)     |
| C(5)  | 37(1)    | 34(1)    | 180(4)   | -44(2)   | -9(2)    | 2(1)     |
| C(6)  | 66(2)    | 85(2)    | 78(2)    | 54(2)    | 38(1)    | 38(1)    |
| C(7)  | 61(1)    | 52(1)    | 26(1)    | -6(1)    | 15(1)    | -16(1)   |
| C(8)  | 26(1)    | 39(1)    | 64(1)    | -11(1)   | -2(1)    | 2(1)     |
| C(9)  | 38(1)    | 23(1)    | 45(1)    | -5(1)    | 12(1)    | -2(1)    |
| C(10) | 36(1)    | 41(1)    | 43(1)    | -2(1)    | 26(1)    | -6(1)    |
| C(11) | 37(1)    | 51(1)    | 31(1)    | -12(1)   | 13(1)    | -10(1)   |
| C(12) | 45(1)    | 48(1)    | 36(1)    | 14(1)    | 18(1)    | 14(1)    |

Table 4: Bond lengths [ $\text{\AA}$ ] for **1**.

|             |            |  |             |            |
|-------------|------------|--|-------------|------------|
| Si(1)-N(1)  | 1.7286(12) |  | Si(3)-C(9)  | 1.8610(17) |
| Si(1)-C(2)  | 1.858(2)   |  | Si(3)-C(8)  | 1.8630(19) |
| Si(1)-C(3)  | 1.864(2)   |  | Si(3)-C(7)  | 1.8703(19) |
| Si(1)-C(1)  | 1.8648(16) |  | Si(3)-Be(1) | 2.7633(18) |
| Si(1)-Be(1) | 2.7547(18) |  | Si(4)-N(2)  | 1.7270(12) |
| Si(2)-N(1)  | 1.7251(12) |  | Si(4)-C(10) | 1.8669(16) |
| Si(2)-C(5)  | 1.841(2)   |  | Si(4)-C(12) | 1.8673(19) |
| Si(2)-C(4)  | 1.8698(18) |  | Si(4)-C(11) | 1.8707(18) |
| Si(2)-C(6)  | 1.885(3)   |  | Si(4)-Be(1) | 2.7633(19) |
| Si(2)-Be(1) | 2.7680(18) |  | N(1)-Be(1)  | 1.525(2)   |
| Si(3)-N(2)  | 1.7295(12) |  | N(2)-Be(1)  | 1.519(2)   |

Table 5: Bond angles [ $^\circ$ ] for **1**.

|                  |            |  |                   |            |
|------------------|------------|--|-------------------|------------|
| N(1)-Si(1)-C(2)  | 112.67(9)  |  | N(2)-Si(4)-C(12)  | 111.30(7)  |
| N(1)-Si(1)-C(3)  | 111.36(9)  |  | C(10)-Si(4)-C(12) | 108.50(9)  |
| C(2)-Si(1)-C(3)  | 108.43(15) |  | N(2)-Si(4)-C(11)  | 108.00(7)  |
| N(1)-Si(1)-C(1)  | 107.92(7)  |  | C(10)-Si(4)-C(11) | 109.18(8)  |
| C(2)-Si(1)-C(1)  | 107.69(11) |  | C(12)-Si(4)-C(11) | 108.13(10) |
| C(3)-Si(1)-C(1)  | 108.63(11) |  | N(2)-Si(4)-Be(1)  | 29.46(5)   |
| N(1)-Si(1)-Be(1) | 29.96(5)   |  | C(10)-Si(4)-Be(1) | 129.89(7)  |
| C(2)-Si(1)-Be(1) | 123.22(11) |  | C(12)-Si(4)-Be(1) | 115.35(7)  |
| C(3)-Si(1)-Be(1) | 123.36(11) |  | C(11)-Si(4)-Be(1) | 79.40(7)   |
| C(1)-Si(1)-Be(1) | 77.96(7)   |  | Be(1)-N(1)-Si(2)  | 116.64(10) |
| N(1)-Si(2)-C(5)  | 112.45(10) |  | Be(1)-N(1)-Si(1)  | 115.55(10) |
| N(1)-Si(2)-C(4)  | 108.18(7)  |  | Si(2)-N(1)-Si(1)  | 127.70(7)  |
| C(5)-Si(2)-C(4)  | 109.54(13) |  | Be(1)-N(2)-Si(4)  | 116.55(10) |
| N(1)-Si(2)-C(6)  | 111.32(10) |  | Be(1)-N(2)-Si(3)  | 116.40(10) |
| C(5)-Si(2)-C(6)  | 108.39(18) |  | Si(4)-N(2)-Si(3)  | 127.05(7)  |
| C(4)-Si(2)-C(6)  | 106.79(11) |  | N(2)-Be(1)-N(1)   | 178.73(16) |
| N(1)-Si(2)-Be(1) | 29.50(5)   |  | N(2)-Be(1)-Si(1)  | 146.06(11) |
| C(5)-Si(2)-Be(1) | 128.45(13) |  | N(1)-Be(1)-Si(1)  | 34.48(6)   |
| C(4)-Si(2)-Be(1) | 78.97(7)   |  | N(2)-Be(1)-Si(3)  | 34.10(6)   |
| C(6)-Si(2)-Be(1) | 117.59(11) |  | N(1)-Be(1)-Si(3)  | 144.74(11) |
| N(2)-Si(3)-C(9)  | 112.12(7)  |  | Si(1)-Be(1)-Si(3) | 133.64(7)  |
| N(2)-Si(3)-C(8)  | 111.30(8)  |  | N(2)-Be(1)-Si(4)  | 33.99(6)   |
| C(9)-Si(3)-C(8)  | 109.04(9)  |  | N(1)-Be(1)-Si(4)  | 147.16(11) |
| N(2)-Si(3)-C(7)  | 107.78(7)  |  | Si(1)-Be(1)-Si(4) | 133.29(7)  |

|                  |            |  |                   |            |
|------------------|------------|--|-------------------|------------|
| C(9)-Si(3)-C(7)  | 108.94(10) |  | Si(3)-Be(1)-Si(4) | 68.09(4)   |
| C(8)-Si(3)-C(7)  | 107.52(11) |  | N(2)-Be(1)-Si(2)  | 145.51(11) |
| N(2)-Si(3)-Be(1) | 29.50(5)   |  | N(1)-Be(1)-Si(2)  | 33.85(6)   |
| C(9)-Si(3)-Be(1) | 131.45(7)  |  | Si(1)-Be(1)-Si(2) | 68.30(4)   |
| C(8)-Si(3)-Be(1) | 113.53(7)  |  | Si(3)-Be(1)-Si(2) | 130.00(7)  |
| C(7)-Si(3)-Be(1) | 79.51(7)   |  | Si(4)-Be(1)-Si(2) | 136.22(7)  |
| N(2)-Si(4)-C(10) | 111.65(7)  |  |                   |            |

## References

- [1] H. Bürger, C. Forker and J. Goubeau, *Monatsh.*, 1965, **96**, 597.
- [2] G. M. Sheldrick, *Acta Crystallogr.* 1990, **A46**, 467
- [3] G. M. Sheldrick, SHELXL-97, Program for the Refinement of Crystal Structures University of Göttingen, Göttingen (Germany) **1997**. (see also: G. M. Sheldrick, *Acta Crystallogr.* 2008, **A64**, 112 )

## Computational Studies

All geometries were fully optimized using tightened convergence criteria and improved integration grids at the density functional theory level, employing the BP86 exchange-correlation functional [1] including a third-generation dispersion correction [2] as implemented in the Turbomole V6.3 quantum chemistry program package [3]. A triple -zeta valence quality Gaussian type function basis set termed def2-TZVP [4] has been used throughout. The resolution-of-the-identity approximation was employed, making use of an appropriate auxiliary basis set [5]. Vibrational frequencies were determined from central numerical differences of analytical gradients. Atom coordinates, energies and the electron localization function (ELF) [6] of the optimized geometry are given below.

## References

- 1 a) A. D. Becke, *Phys. Rev. A* 1988, **38**, 3098; b) J. P. Perdew, *Phys. Rev. B* 1986, **33**, 8822.
- 2 S. Grimme, J. Antony, S. Ehrlich and H. Krieg, *J. Chem. Phys.* 2010, **132**, 154104.
- 3 a) TURBOMOLE V6.3 2011, a development of University of Karlsruhe and Forschungszentrum Karlsruhe GmbH, 1989-2007, TURBOMOLE GmbH, since 2007; available from <http://www.turbomole.com>; b) R. Ahlrichs, M. Bär, M. Häser, H. Horn and C. Kölmel, *Chem. Phys. Letters* 1989, **162**, 165; c) M. Häser and R. Ahlrichs, *J. Comput. Chem.* 1989, **10**, 104; d) O. Treutler and R. Ahlrichs, *J. Chem. Phys.* 1995, **102**, 346; e) M. v. Arnim and R. Ahlrichs, *J. Chem. Phys.* 1999, **111**, 9183.
- 4 a) F. Weigend, F. Furche and R. Ahlrichs, *J. Chem. Phys.* 2003, **119**, 12753; b) F. Weigend and R. Ahlrichs, *Phys. Chem. Chem. Phys.* 2005, **7**, 3297.
- 5 F. Weigend, *Phys. Chem. Chem. Phys.* 2006, **8**, 1057.
- 6 a) A. D. Becke and K. E. Edgecombe, *J. Chem. Phys.* 1990, **92**, 5397; b) A. Savin and B. Silvi, *Nature* 1994, **371**, 683.

**Be[N(SiMe<sub>3</sub>)<sub>2</sub>]<sub>2</sub>****Energy (in Hartree) and atomic coordinates (in Å):** Energy = -1762.005517557

|    |            |            |            |
|----|------------|------------|------------|
| Si | -1,565556  | -0,1015462 | 2,2844377  |
| Si | 1,565556   | 0,1015462  | 2,2844377  |
| Si | 0,1015462  | -1,565556  | -2,2844377 |
| Si | -0,1015462 | 1,565556   | -2,2844377 |
| N  | 0          | 0          | 1,5250395  |
| N  | 0          | 0          | -1,5250395 |
| Be | 0          | 0          | 0          |
| C  | -2,8467518 | 0,3183826  | 0,9612718  |
| C  | -1,713281  | 1,1165967  | 3,7143417  |
| C  | -1,8881378 | -1,8447041 | 2,9209687  |
| C  | 2,8467518  | -0,3183826 | 0,9612718  |
| C  | 1,8881378  | 1,8447041  | 2,9209687  |
| C  | 1,713281   | -1,1165967 | 3,7143417  |
| C  | -0,3183826 | -2,8467518 | -0,9612718 |
| C  | 1,8447041  | -1,8881378 | -2,9209687 |
| C  | -1,1165967 | -1,713281  | -3,7143417 |
| C  | 1,1165967  | 1,713281   | -3,7143417 |
| C  | 0,3183826  | 2,8467518  | -0,9612718 |
| C  | -1,8447041 | 1,8881378  | -2,9209687 |
| H  | -2,7118113 | 1,3470514  | 0,5938985  |
| H  | -3,8701629 | 0,2318871  | 1,3552993  |
| H  | -2,7660371 | -0,3556118 | 0,0937788  |
| H  | -1,5220099 | 2,1459207  | 3,3781     |
| H  | -0,9935224 | 0,8831183  | 4,5131195  |
| H  | -2,7208808 | 1,0818754  | 4,1552858  |
| H  | -1,7989365 | -2,5738366 | 2,1019757  |
| H  | -2,895388  | -1,937103  | 3,3545602  |
| H  | -1,158577  | -2,1219893 | 3,6956618  |
| H  | 2,7660371  | 0,3556118  | 0,0937788  |
| H  | 2,7118113  | -1,3470514 | 0,5938985  |
| H  | 3,8701629  | -0,2318871 | 1,3552993  |
| H  | 1,7989365  | 2,5738366  | 2,1019757  |
| H  | 2,895388   | 1,937103   | 3,3545602  |
| H  | 1,158577   | 2,1219893  | 3,6956618  |
| H  | 1,5220099  | -2,1459207 | 3,3781     |
| H  | 0,9935224  | -0,8831183 | 4,5131195  |
| H  | 2,7208808  | -1,0818754 | 4,1552858  |
| H  | -0,2318871 | -3,8701629 | -1,3552993 |
| H  | -1,3470514 | -2,7118113 | -0,5938985 |
| H  | 0,3556118  | -2,7660371 | -0,0937788 |
| H  | 2,1219893  | -1,158577  | -3,6956618 |
| H  | 1,937103   | -2,895388  | -3,3545602 |
| H  | 2,5738366  | -1,7989365 | -2,1019757 |
| H  | -0,8831183 | -0,9935224 | -4,5131195 |
| H  | -2,1459207 | -1,5220099 | -3,3781    |
| H  | -1,0818754 | -2,7208808 | -4,1552858 |
| H  | 0,8831183  | 0,9935224  | -4,5131195 |
| H  | 2,1459207  | 1,5220099  | -3,3781    |

|   |            |           |            |
|---|------------|-----------|------------|
| H | 1,0818754  | 2,7208808 | -4,1552858 |
| H | 0,2318871  | 3,8701629 | -1,3552993 |
| H | 1,3470514  | 2,7118113 | -0,5938985 |
| H | -0,3556118 | 2,7660371 | -0,0937788 |
| H | -2,1219893 | 1,158577  | -3,6956618 |
| H | -1,937103  | 2,895388  | -3,3545602 |
| H | -2,5738366 | 1,7989365 | -2,1019757 |

### Vibrational frequencies:

| mode | symmetry | wave number | IR intensity | selection rules |       |
|------|----------|-------------|--------------|-----------------|-------|
|      |          | cm**(-1)    | km/mol       | IR              | RAMAN |
| 1    |          | 0.00        | 0.00000      | -               | -     |
| 2    |          | 0.00        | 0.00000      | -               | -     |
| 3    |          | 0.00        | 0.00000      | -               | -     |
| 4    |          | 0.00        | 0.00000      | -               | -     |
| 5    |          | 0.00        | 0.00000      | -               | -     |
| 6    |          | 0.00        | 0.00000      | -               | -     |
| 7    | b        | 5.62        | 0.00833      | YES             | YES   |
| 8    | e        | 28.35       | 0.03419      | YES             | YES   |
| 9    | e        | 28.35       | 0.03419      | YES             | YES   |
| 10   | a        | 41.52       | 0.00000      | NO              | YES   |
| 11   | e        | 42.52       | 0.02380      | YES             | YES   |
| 12   | e        | 42.52       | 0.02380      | YES             | YES   |
| 13   | b        | 50.49       | 0.00000      | YES             | YES   |
| 14   | a        | 73.79       | 0.00000      | NO              | YES   |
| 15   | e        | 92.84       | 0.08072      | YES             | YES   |
| 16   | e        | 92.84       | 0.08072      | YES             | YES   |
| 17   | b        | 108.80      | 0.26501      | YES             | YES   |
| 18   | e        | 153.29      | 0.11306      | YES             | YES   |
| 19   | e        | 153.29      | 0.11306      | YES             | YES   |
| 20   | a        | 157.91      | 0.00000      | NO              | YES   |
| 21   | b        | 159.12      | 0.00300      | YES             | YES   |
| 22   | a        | 163.49      | 0.00000      | NO              | YES   |
| 23   | b        | 165.77      | 0.00406      | YES             | YES   |
| 24   | a        | 166.58      | 0.00000      | NO              | YES   |
| 25   | b        | 174.36      | 0.03368      | YES             | YES   |
| 26   | a        | 177.09      | 0.00000      | NO              | YES   |
| 27   | e        | 178.87      | 0.21105      | YES             | YES   |
| 28   | e        | 178.87      | 0.21105      | YES             | YES   |
| 29   | e        | 181.21      | 0.08703      | YES             | YES   |
| 30   | e        | 181.21      | 0.08703      | YES             | YES   |
| 31   | b        | 181.79      | 0.00720      | YES             | YES   |
| 32   | a        | 185.04      | 0.00000      | NO              | YES   |
| 33   | e        | 186.70      | 0.02064      | YES             | YES   |
| 34   | e        | 186.70      | 0.02064      | YES             | YES   |
| 35   | b        | 191.99      | 0.49720      | YES             | YES   |
| 36   | a        | 196.32      | 0.00000      | NO              | YES   |
| 37   | e        | 198.64      | 0.74984      | YES             | YES   |
| 38   | e        | 198.64      | 0.74984      | YES             | YES   |
| 39   | b        | 209.00      | 5.43670      | YES             | YES   |
| 40   | e        | 219.84      | 2.46496      | YES             | YES   |
| 41   | e        | 219.84      | 2.46496      | YES             | YES   |
| 42   | a        | 230.64      | 0.00000      | NO              | YES   |

|    |   |         |           |     |     |
|----|---|---------|-----------|-----|-----|
| 43 | b | 231.73  | 0.00814   | YES | YES |
| 44 | a | 238.03  | 0.00000   | NO  | YES |
| 45 | e | 249.19  | 8.56024   | YES | YES |
| 46 | e | 249.19  | 8.56024   | YES | YES |
| 47 | e | 308.51  | 0.31507   | YES | YES |
| 48 | e | 308.51  | 0.31507   | YES | YES |
| 49 | b | 314.21  | 0.79343   | YES | YES |
| 50 | e | 382.85  | 35.49114  | YES | YES |
| 51 | e | 382.85  | 35.49114  | YES | YES |
| 52 | a | 386.41  | 0.00000   | NO  | YES |
| 53 | b | 527.46  | 8.61359   | YES | YES |
| 54 | e | 595.08  | 6.58964   | YES | YES |
| 55 | e | 595.08  | 6.58964   | YES | YES |
| 56 | a | 616.31  | 0.00000   | NO  | YES |
| 57 | b | 643.85  | 15.40855  | YES | YES |
| 58 | e | 653.98  | 0.01710   | YES | YES |
| 59 | e | 653.98  | 0.01710   | YES | YES |
| 60 | a | 654.71  | 0.00000   | NO  | YES |
| 61 | b | 656.88  | 0.61021   | YES | YES |
| 62 | a | 664.22  | 0.00000   | NO  | YES |
| 63 | e | 664.27  | 3.66748   | YES | YES |
| 64 | e | 664.27  | 3.66748   | YES | YES |
| 65 | a | 665.11  | 0.00000   | NO  | YES |
| 66 | b | 665.17  | 0.42111   | YES | YES |
| 67 | e | 667.08  | 11.29361  | YES | YES |
| 68 | e | 667.08  | 11.29361  | YES | YES |
| 69 | b | 667.74  | 25.41248  | YES | YES |
| 70 | a | 721.67  | 0.00000   | NO  | YES |
| 71 | a | 734.79  | 0.00000   | NO  | YES |
| 72 | b | 735.51  | 0.03567   | YES | YES |
| 73 | e | 736.89  | 0.88205   | YES | YES |
| 74 | e | 736.89  | 0.88205   | YES | YES |
| 75 | e | 746.80  | 26.66734  | YES | YES |
| 76 | e | 746.80  | 26.66734  | YES | YES |
| 77 | b | 754.81  | 50.71870  | YES | YES |
| 78 | e | 816.24  | 78.41716  | YES | YES |
| 79 | e | 816.24  | 78.41716  | YES | YES |
| 80 | a | 822.77  | 0.00000   | NO  | YES |
| 81 | b | 825.46  | 0.77023   | YES | YES |
| 82 | e | 825.56  | 29.79258  | YES | YES |
| 83 | e | 825.56  | 29.79258  | YES | YES |
| 84 | a | 827.80  | 0.00000   | NO  | YES |
| 85 | e | 833.82  | 148.49108 | YES | YES |
| 86 | e | 833.82  | 148.49108 | YES | YES |
| 87 | b | 836.72  | 142.45380 | YES | YES |
| 88 | a | 854.40  | 0.00000   | NO  | YES |
| 89 | b | 857.27  | 412.81146 | YES | YES |
| 90 | a | 930.23  | 0.00000   | NO  | YES |
| 91 | e | 961.26  | 486.56939 | YES | YES |
| 92 | e | 961.26  | 486.56939 | YES | YES |
| 93 | b | 1230.08 | 1.14796   | YES | YES |
| 94 | a | 1230.08 | 0.00000   | NO  | YES |
| 95 | e | 1230.95 | 13.03287  | YES | YES |
| 96 | e | 1230.95 | 13.03287  | YES | YES |

|     |   |         |           |     |     |
|-----|---|---------|-----------|-----|-----|
| 97  | e | 1231.86 | 68.14648  | YES | YES |
| 98  | e | 1231.86 | 68.14648  | YES | YES |
| 99  | b | 1234.04 | 109.59327 | YES | YES |
| 100 | a | 1236.92 | 0.00000   | NO  | YES |
| 101 | e | 1241.08 | 40.19040  | YES | YES |
| 102 | e | 1241.08 | 40.19040  | YES | YES |
| 103 | b | 1242.54 | 13.74825  | YES | YES |
| 104 | a | 1244.70 | 0.00000   | NO  | YES |
| 105 | b | 1353.06 | 697.24345 | YES | YES |
| 106 | e | 1398.78 | 0.35666   | YES | YES |
| 107 | e | 1398.78 | 0.35666   | YES | YES |
| 108 | a | 1401.10 | 0.00000   | NO  | YES |
| 109 | b | 1402.28 | 4.65487   | YES | YES |
| 110 | a | 1404.20 | 0.00000   | NO  | YES |
| 111 | b | 1405.00 | 2.07603   | YES | YES |
| 112 | a | 1405.48 | 0.00000   | NO  | YES |
| 113 | e | 1406.05 | 2.80421   | YES | YES |
| 114 | e | 1406.05 | 2.80421   | YES | YES |
| 115 | b | 1407.37 | 7.71069   | YES | YES |
| 116 | e | 1408.05 | 1.68486   | YES | YES |
| 117 | e | 1408.05 | 1.68486   | YES | YES |
| 118 | e | 1414.36 | 5.78335   | YES | YES |
| 119 | e | 1414.36 | 5.78335   | YES | YES |
| 120 | a | 1416.18 | 0.00000   | NO  | YES |
| 121 | e | 1417.95 | 1.47527   | YES | YES |
| 122 | e | 1417.95 | 1.47527   | YES | YES |
| 123 | b | 1418.90 | 0.08112   | YES | YES |
| 124 | a | 1419.74 | 0.00000   | NO  | YES |
| 125 | b | 1421.64 | 13.41823  | YES | YES |
| 126 | e | 1425.34 | 15.07420  | YES | YES |
| 127 | e | 1425.34 | 15.07420  | YES | YES |
| 128 | a | 1426.06 | 0.00000   | NO  | YES |
| 129 | b | 1428.02 | 20.49569  | YES | YES |
| 130 | a | 2951.54 | 0.00000   | NO  | YES |
| 131 | e | 2951.78 | 3.24059   | YES | YES |
| 132 | e | 2951.78 | 3.24059   | YES | YES |
| 133 | b | 2952.07 | 23.54197  | YES | YES |
| 134 | e | 2957.07 | 16.62376  | YES | YES |
| 135 | e | 2957.07 | 16.62376  | YES | YES |
| 136 | a | 2957.34 | 0.00000   | NO  | YES |
| 137 | b | 2957.36 | 1.14825   | YES | YES |
| 138 | e | 2958.55 | 3.95459   | YES | YES |
| 139 | e | 2958.55 | 3.95459   | YES | YES |
| 140 | b | 2958.76 | 21.87940  | YES | YES |
| 141 | a | 2958.80 | 0.00000   | NO  | YES |
| 142 | b | 3024.64 | 8.41058   | YES | YES |
| 143 | e | 3024.70 | 15.97828  | YES | YES |
| 144 | e | 3024.70 | 15.97828  | YES | YES |
| 145 | a | 3024.76 | 0.00000   | NO  | YES |
| 146 | e | 3032.56 | 13.95543  | YES | YES |
| 147 | e | 3032.56 | 13.95543  | YES | YES |
| 148 | a | 3033.12 | 0.00000   | NO  | YES |
| 149 | b | 3033.13 | 1.98291   | YES | YES |
| 150 | a | 3034.22 | 0.00000   | NO  | YES |



|     |   |         |          |     |     |
|-----|---|---------|----------|-----|-----|
| 151 | e | 3034.35 | 5.99897  | YES | YES |
| 152 | e | 3034.35 | 5.99897  | YES | YES |
| 153 | b | 3034.59 | 2.14155  | YES | YES |
| 154 | b | 3036.24 | 34.72206 | YES | YES |
| 155 | e | 3036.29 | 49.42136 | YES | YES |
| 156 | e | 3036.29 | 49.42136 | YES | YES |
| 157 | a | 3036.66 | 0.00000  | NO  | YES |
| 158 | e | 3040.04 | 21.14281 | YES | YES |
| 159 | e | 3040.04 | 21.14281 | YES | YES |
| 160 | b | 3040.47 | 53.50711 | YES | YES |
| 161 | a | 3040.56 | 0.00000  | NO  | YES |
| 162 | e | 3040.96 | 8.26495  | YES | YES |
| 163 | e | 3040.96 | 8.26495  | YES | YES |
| 164 | a | 3041.25 | 0.00000  | NO  | YES |
| 165 | b | 3041.26 | 0.10463  | YES | YES |

**Electron localization function:**

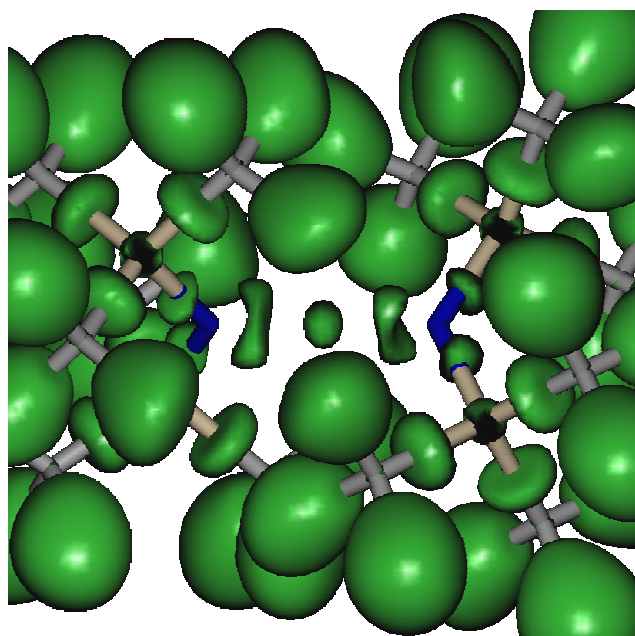

**Fig. S1** ELF isosurfaces of  $\text{Be}[\text{N}(\text{SiMe}_3)_2]_2$  (isovalue 0.850, Be atom in the centre).

## Be[N(SiH<sub>3</sub>)<sub>2</sub>]<sub>2</sub>

### Energy (in Hartree) and atomic coordinates (in Å):

Energy = -1289.830208033

|    |            |            |            |
|----|------------|------------|------------|
| Si | -1.0831094 | 1.0831094  | 2.3604091  |
| Si | 1.0831094  | -1.0831094 | 2.3604091  |
| Si | -1.0831094 | -1.0831094 | -2.3604091 |
| Si | 1.0831094  | 1.0831094  | -2.3604091 |
| N  | 0.0000000  | 0.0000000  | 1.5280684  |
| N  | 0.0000000  | 0.0000000  | -1.5280684 |
| Be | 0.0000000  | 0.0000000  | 0.0000000  |
| H  | -1.8455720 | 1.8455720  | 1.3239748  |
| H  | -0.3368391 | 2.0473607  | 3.2268435  |
| H  | -2.0473607 | 0.3368391  | 3.2268435  |
| H  | 1.8455720  | -1.8455720 | 1.3239748  |
| H  | 2.0473607  | -0.3368391 | 3.2268435  |
| H  | 0.3368391  | -2.0473607 | 3.2268435  |
| H  | -1.8455720 | -1.8455720 | -1.3239748 |
| H  | -0.3368391 | -2.0473607 | -3.2268435 |
| H  | -2.0473607 | -0.3368391 | -3.2268435 |
| H  | 2.0473607  | 0.3368391  | -3.2268435 |
| H  | 1.8455720  | 1.8455720  | -1.3239748 |
| H  | 0.3368391  | 2.0473607  | -3.2268435 |

### Vibrational frequencies:

| mode | symmetry | wave number<br>cm**(-1) | IR intensity<br>km/mol | selection rules<br>IR | selection rules<br>RAMAN |
|------|----------|-------------------------|------------------------|-----------------------|--------------------------|
| 1    |          | 0.00                    | 0.00000                | -                     | -                        |
| 2    |          | 0.00                    | 0.00000                | -                     | -                        |
| 3    |          | 0.00                    | 0.00000                | -                     | -                        |
| 4    |          | 0.00                    | 0.00000                | -                     | -                        |
| 5    |          | 0.00                    | 0.00000                | -                     | -                        |
| 6    |          | 0.00                    | 0.00000                | -                     | -                        |
| 7    | b1       | 10.63                   | 0.00000                | NO                    | YES                      |
| 8    | e        | 50.03                   | 0.16586                | YES                   | YES                      |
| 9    | e        | 50.03                   | 0.16586                | YES                   | YES                      |
| 10   | a2       | 89.74                   | 0.00000                | NO                    | NO                       |
| 11   | b1       | 90.03                   | 0.00000                | NO                    | YES                      |
| 12   | e        | 90.85                   | 0.14541                | YES                   | YES                      |
| 13   | e        | 90.85                   | 0.14541                | YES                   | YES                      |
| 14   | a1       | 104.79                  | 0.00000                | NO                    | YES                      |
| 15   | e        | 142.72                  | 0.00222                | YES                   | YES                      |
| 16   | e        | 142.72                  | 0.00222                | YES                   | YES                      |
| 17   | b2       | 161.24                  | 3.18192                | YES                   | YES                      |
| 18   | e        | 344.58                  | 10.82588               | YES                   | YES                      |
| 19   | e        | 344.58                  | 10.82588               | YES                   | YES                      |
| 20   | a1       | 373.54                  | 0.00000                | NO                    | YES                      |
| 21   | b2       | 580.61                  | 4.62333                | YES                   | YES                      |
| 22   | a1       | 649.66                  | 0.00000                | NO                    | YES                      |
| 23   | a2       | 665.56                  | 0.00000                | NO                    | NO                       |
| 24   | b1       | 669.12                  | 0.00000                | NO                    | YES                      |

|    |    |         |           |     |     |
|----|----|---------|-----------|-----|-----|
| 25 | e  | 673.16  | 0.04472   | YES | YES |
| 26 | e  | 673.16  | 0.04472   | YES | YES |
| 27 | e  | 709.14  | 62.55074  | YES | YES |
| 28 | e  | 709.14  | 62.55074  | YES | YES |
| 29 | b2 | 755.31  | 82.05481  | YES | YES |
| 30 | e  | 912.28  | 114.35520 | YES | YES |
| 31 | e  | 912.28  | 114.35520 | YES | YES |
| 32 | a2 | 914.28  | 0.00000   | NO  | NO  |
| 33 | b1 | 915.19  | 0.00000   | NO  | YES |
| 34 | e  | 919.36  | 655.66417 | YES | YES |
| 35 | e  | 919.36  | 655.66417 | YES | YES |
| 36 | e  | 936.80  | 7.47080   | YES | YES |
| 37 | e  | 936.80  | 7.47080   | YES | YES |
| 38 | a1 | 937.92  | 0.00000   | NO  | YES |
| 39 | b2 | 939.29  | 0.13509   | YES | YES |
| 40 | a1 | 946.07  | 0.00000   | NO  | YES |
| 41 | b2 | 956.49  | 620.06464 | YES | YES |
| 42 | e  | 976.66  | 50.64752  | YES | YES |
| 43 | e  | 976.66  | 50.64752  | YES | YES |
| 44 | a1 | 981.25  | 0.00000   | NO  | YES |
| 45 | b2 | 1363.05 | 796.00678 | YES | YES |
| 46 | a2 | 2149.67 | 0.00000   | NO  | NO  |
| 47 | b1 | 2150.01 | 0.00000   | NO  | YES |
| 48 | e  | 2153.64 | 39.73609  | YES | YES |
| 49 | e  | 2153.64 | 39.73609  | YES | YES |
| 50 | e  | 2154.26 | 140.71023 | YES | YES |
| 51 | e  | 2154.26 | 140.71023 | YES | YES |
| 52 | e  | 2158.26 | 192.09204 | YES | YES |
| 53 | e  | 2158.26 | 192.09204 | YES | YES |
| 54 | a1 | 2159.95 | 0.00000   | NO  | YES |
| 55 | b2 | 2160.21 | 474.49528 | YES | YES |
| 56 | b2 | 2162.72 | 30.47511  | YES | YES |
| 57 | a1 | 2165.38 | 0.00000   | NO  | YES |

**Electron localization function:**

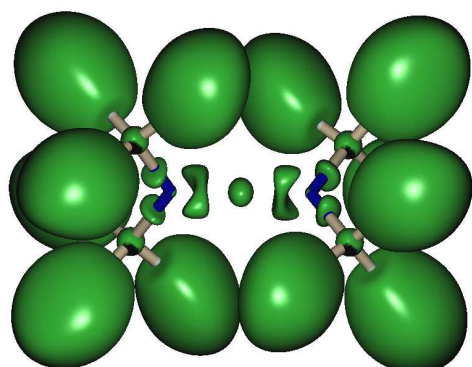

**Fig. S2** ELF isosurfaces of  $\text{Be}[\text{N}(\text{SiH}_3)_2]_2$  (isovalue 0.850, Be atom in the centre).

## Be[N(CH<sub>3</sub>)<sub>2</sub>]<sub>2</sub>

### Energy (in Hartree) and atomic coordinates (in Å):

Energy = -284.0657271656

|    |            |            |            |
|----|------------|------------|------------|
| C  | -0.8543001 | 0.8543001  | 2.3247129  |
| C  | 0.8543001  | -0.8543001 | 2.3247129  |
| C  | -0.8543001 | -0.8543001 | -2.3247129 |
| C  | 0.8543001  | 0.8543001  | -2.3247129 |
| N  | 0.0000000  | 0.0000000  | 1.5169187  |
| N  | 0.0000000  | 0.0000000  | -1.5169187 |
| Be | 0.0000000  | 0.0000000  | 0.0000000  |
| H  | -1.4871900 | 1.4871900  | 1.6857076  |
| H  | -0.2638636 | 1.5238653  | 2.9815261  |
| H  | -1.5238653 | 0.2638636  | 2.9815261  |
| H  | 1.4871900  | -1.4871900 | 1.6857076  |
| H  | 1.5238653  | -0.2638636 | 2.9815261  |
| H  | 0.2638636  | -1.5238653 | 2.9815261  |
| H  | -1.4871900 | -1.4871900 | -1.6857076 |
| H  | -0.2638636 | -1.5238653 | -2.9815261 |
| H  | -1.5238653 | -0.2638636 | -2.9815261 |
| H  | 1.5238653  | 0.2638636  | -2.9815261 |
| H  | 1.4871900  | 1.4871900  | -1.6857076 |
| H  | 0.2638636  | 1.5238653  | -2.9815261 |

### Vibrational frequencies:

| mode | symmetry | wave number | IR intensity | selection rules |       |
|------|----------|-------------|--------------|-----------------|-------|
|      |          | cm**(-1)    | km/mol       | IR              | RAMAN |
| 1    |          | 0.00        | 0.00000      | -               | -     |
| 2    |          | 0.00        | 0.00000      | -               | -     |
| 3    |          | 0.00        | 0.00000      | -               | -     |
| 4    |          | 0.00        | 0.00000      | -               | -     |
| 5    |          | 0.00        | 0.00000      | -               | -     |
| 6    |          | 0.00        | 0.00000      | -               | -     |
| 7    | b1       | 63.10       | 0.00000      | NO              | YES   |
| 8    | e        | 77.80       | 0.01265      | YES             | YES   |
| 9    | e        | 77.80       | 0.01265      | YES             | YES   |
| 10   | e        | 175.33      | 1.84963      | YES             | YES   |
| 11   | e        | 175.33      | 1.84963      | YES             | YES   |
| 12   | a2       | 232.75      | 0.00000      | NO              | NO    |
| 13   | b1       | 232.85      | 0.00000      | NO              | YES   |
| 14   | a1       | 276.12      | 0.00000      | NO              | YES   |
| 15   | e        | 280.57      | 2.64770      | YES             | YES   |
| 16   | e        | 280.57      | 2.64770      | YES             | YES   |
| 17   | b2       | 400.31      | 0.40412      | YES             | YES   |
| 18   | e        | 429.21      | 30.95165     | YES             | YES   |
| 19   | e        | 429.21      | 30.95165     | YES             | YES   |
| 20   | a1       | 545.23      | 0.00000      | NO              | YES   |
| 21   | b2       | 892.04      | 24.80729     | YES             | YES   |
| 22   | a1       | 998.33      | 0.00000      | NO              | YES   |
| 23   | e        | 1057.35     | 5.67031      | YES             | YES   |
| 24   | e        | 1057.35     | 5.67031      | YES             | YES   |
| 25   | a2       | 1074.64     | 0.00000      | NO              | NO    |

|    |    |         |           |     |     |
|----|----|---------|-----------|-----|-----|
| 26 | b1 | 1079.28 | 0.00000   | NO  | YES |
| 27 | e  | 1129.66 | 2.40382   | YES | YES |
| 28 | e  | 1129.66 | 2.40382   | YES | YES |
| 29 | b2 | 1148.23 | 97.43242  | YES | YES |
| 30 | e  | 1158.05 | 54.22564  | YES | YES |
| 31 | e  | 1158.05 | 54.22564  | YES | YES |
| 32 | a1 | 1274.50 | 0.00000   | NO  | YES |
| 33 | e  | 1399.80 | 1.91206   | YES | YES |
| 34 | e  | 1399.80 | 1.91206   | YES | YES |
| 35 | b2 | 1413.31 | 213.72428 | YES | YES |
| 36 | a2 | 1422.53 | 0.00000   | NO  | NO  |
| 37 | b1 | 1423.57 | 0.00000   | NO  | YES |
| 38 | a1 | 1427.47 | 0.00000   | NO  | YES |
| 39 | e  | 1432.55 | 7.98400   | YES | YES |
| 40 | e  | 1432.55 | 7.98400   | YES | YES |
| 41 | b2 | 1441.50 | 45.27087  | YES | YES |
| 42 | e  | 1455.40 | 14.96888  | YES | YES |
| 43 | e  | 1455.40 | 14.96888  | YES | YES |
| 44 | a1 | 1474.74 | 0.00000   | NO  | YES |
| 45 | b2 | 1526.63 | 293.42087 | YES | YES |
| 46 | e  | 2871.29 | 71.40073  | YES | YES |
| 47 | e  | 2871.29 | 71.40073  | YES | YES |
| 48 | b2 | 2875.49 | 375.06151 | YES | YES |
| 49 | a1 | 2880.01 | 0.00000   | NO  | YES |
| 50 | e  | 2896.57 | 128.69278 | YES | YES |
| 51 | e  | 2896.57 | 128.69278 | YES | YES |
| 52 | a2 | 2907.97 | 0.00000   | NO  | NO  |
| 53 | b1 | 2908.10 | 0.00000   | NO  | YES |
| 54 | e  | 3008.44 | 30.64839  | YES | YES |
| 55 | e  | 3008.44 | 30.64839  | YES | YES |
| 56 | b2 | 3009.99 | 62.65424  | YES | YES |
| 57 | a1 | 3010.06 | 0.00000   | NO  | YES |

**Electron localization function:**

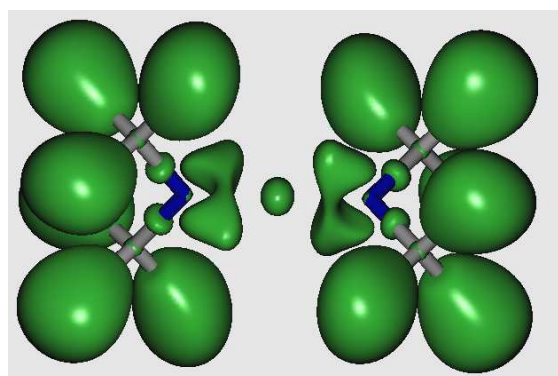

**Fig. S3** ELF isosurfaces of  $\text{Be}[\text{N}(\text{CH}_3)_2]_2$  (isovalue 0.850, Be atom in the centre).

## Be(NH<sub>2</sub>)<sub>2</sub>

### Energy (in Hartree) and atomic coordinates (in Å):

Energy = -126.7941708946

|    |            |            |            |
|----|------------|------------|------------|
| H  | -0.5869150 | -0.5869150 | -2.1094516 |
| H  | 0.5869150  | 0.5869150  | -2.1094516 |
| H  | -0.5869150 | 0.5869150  | 2.1094516  |
| H  | 0.5869150  | -0.5869150 | 2.1094516  |
| N  | 0.0000000  | 0.0000000  | -1.5216276 |
| N  | 0.0000000  | 0.0000000  | 1.5216276  |
| Be | 0.0000000  | 0.0000000  | 0.0000000  |

### Vibrational frequencies:

| mode | symmetry | wave number           | IR intensity | selection rules |       |
|------|----------|-----------------------|--------------|-----------------|-------|
|      |          | cm <sup>**</sup> (-1) | km/mol       | IR              | RAMAN |
| 1    |          | 0.00                  | 0.00000      | -               | -     |
| 2    |          | 0.00                  | 0.00000      | -               | -     |
| 3    |          | 0.00                  | 0.00000      | -               | -     |
| 4    |          | 0.00                  | 0.00000      | -               | -     |
| 5    |          | 0.00                  | 0.00000      | -               | -     |
| 6    |          | 0.00                  | 0.00000      | -               | -     |
| 7    | e        | 260.33                | 7.61132      | YES             | YES   |
| 8    | e        | 260.33                | 7.61132      | YES             | YES   |
| 9    | e        | 376.37                | 152.86698    | YES             | YES   |
| 10   | e        | 376.37                | 152.86698    | YES             | YES   |
| 11   | b1       | 389.49                | 0.00000      | NO              | YES   |
| 12   | a1       | 667.15                | 0.00000      | NO              | YES   |
| 13   | e        | 691.77                | 61.76165     | YES             | YES   |
| 14   | e        | 691.77                | 61.76165     | YES             | YES   |
| 15   | b2       | 1373.63               | 218.35647    | YES             | YES   |
| 16   | a1       | 1534.16               | 0.00000      | NO              | YES   |
| 17   | b2       | 1542.47               | 206.21765    | YES             | YES   |
| 18   | b2       | 3473.62               | 39.15021     | YES             | YES   |
| 19   | a1       | 3474.57               | 0.00000      | NO              | YES   |
| 20   | e        | 3550.13               | 19.06097     | YES             | YES   |
| 21   | e        | 3550.13               | 19.06097     | YES             | YES   |

### Electron localization function:

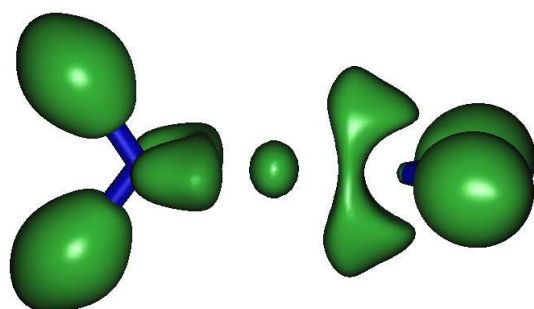

Fig. S4 ELF isosurfaces of Be(NH<sub>2</sub>)<sub>2</sub> (isovalue 0.850, Be atom in the centre).

## BeMe<sub>2</sub>

### Energy (in Hartree) and atomic coordinates (in Å):

Energy = -94.60648543539

|    |            |            |            |
|----|------------|------------|------------|
| Be | 0.0000000  | 0.0000000  | 0.0000000  |
| C  | 0.0000000  | 0.0000000  | 1.6915401  |
| C  | 0.0000000  | 0.0000000  | -1.6915401 |
| H  | 0.8840420  | 0.5104019  | 2.1115851  |
| H  | 0.0000000  | -1.0208038 | 2.1115851  |
| H  | -0.8840420 | 0.5104019  | 2.1115851  |
| H  | -0.8840420 | -0.5104019 | -2.1115851 |
| H  | 0.8840420  | -0.5104019 | -2.1115851 |
| H  | 0.0000000  | 1.0208038  | -2.1115851 |

### Vibrational frequencies:

| mode | symmetry | wave number<br>cm**(-1) | IR intensity<br>km/mol | IR  | RAMAN |
|------|----------|-------------------------|------------------------|-----|-------|
| 1    |          | 0.00                    | 0.00000                | -   | -     |
| 2    |          | 0.00                    | 0.00000                | -   | -     |
| 3    |          | 0.00                    | 0.00000                | -   | -     |
| 4    |          | 0.00                    | 0.00000                | -   | -     |
| 5    |          | 0.00                    | 0.00000                | -   | -     |
| 6    |          | 0.00                    | 0.00000                | -   | -     |
| 7    | a1u      | 84.46                   | 0.00000                | NO  | NO    |
| 8    | eu       | 215.25                  | 4.75436                | YES | NO    |
| 9    | eu       | 215.25                  | 4.75436                | YES | NO    |
| 10   | a1g      | 533.73                  | 0.00000                | NO  | YES   |
| 11   | eg       | 558.66                  | 0.00000                | NO  | YES   |
| 12   | eg       | 558.66                  | 0.00000                | NO  | YES   |
| 13   | eu       | 739.34                  | 105.29125              | YES | NO    |
| 14   | eu       | 739.34                  | 105.29125              | YES | NO    |
| 15   | a2u      | 1076.72                 | 67.45628               | YES | NO    |
| 16   | a1g      | 1198.78                 | 0.00000                | NO  | YES   |
| 17   | a2u      | 1221.73                 | 148.85917              | YES | NO    |
| 18   | eg       | 1400.41                 | 0.00000                | NO  | YES   |
| 19   | eg       | 1400.41                 | 0.00000                | NO  | YES   |
| 20   | eu       | 1403.20                 | 1.63336                | YES | NO    |
| 21   | eu       | 1403.20                 | 1.63336                | YES | NO    |
| 22   | a2u      | 2935.12                 | 5.47014                | YES | NO    |
| 23   | a1g      | 2936.72                 | 0.00000                | NO  | YES   |
| 24   | eu       | 3000.27                 | 26.24979               | YES | NO    |
| 25   | eu       | 3000.27                 | 26.24979               | YES | NO    |
| 26   | eg       | 3000.83                 | 0.00000                | NO  | YES   |
| 27   | eg       | 3000.83                 | 0.00000                | NO  | YES   |

## Be(OH)<sub>2</sub>

### Energy (in Hartree) and atomic coordinates (in Å):

Energy = -166.5929384782

|    |            |            |            |
|----|------------|------------|------------|
| H  | 0.5661304  | -2.0346567 | 0.2904894  |
| H  | -0.5661304 | 2.0346567  | 0.2904894  |
| O  | 0.0005603  | -1.4394278 | -0.2134190 |
| O  | -0.0005603 | 1.4394278  | -0.2134190 |
| Be | 0.0000000  | 0.0000000  | -0.1541408 |

### Vibrational frequencies:

| mode | symmetry | wave number | IR intensity | selection rules |
|------|----------|-------------|--------------|-----------------|
|      |          | cm**(-1)    | km/mol       | IR RAMAN        |
| 1    |          | 0.00        | 0.00000      | - -             |
| 2    |          | 0.00        | 0.00000      | - -             |
| 3    |          | 0.00        | 0.00000      | - -             |
| 4    |          | 0.00        | 0.00000      | - -             |
| 5    |          | 0.00        | 0.00000      | - -             |
| 6    |          | 0.00        | 0.00000      | - -             |
| 7    | a        | 214.59      | 124.92073    | YES YES         |
| 8    | b        | 296.86      | 68.51329     | YES YES         |
| 9    | a        | 300.98      | 28.48539     | YES YES         |
| 10   | b        | 571.30      | 316.55005    | YES YES         |
| 11   | a        | 576.84      | 74.23207     | YES YES         |
| 12   | a        | 715.28      | 1.73302      | YES YES         |
| 13   | b        | 1484.40     | 356.99605    | YES YES         |
| 14   | b        | 3844.10     | 150.45562    | YES YES         |
| 15   | a        | 3845.22     | 21.28893     | YES YES         |



## BeF<sub>2</sub>

### Energy (in Hartree) and atomic coordinates (in Å):

Energy = -214.6838272174

|    |           |           |            |
|----|-----------|-----------|------------|
| Be | 0.0000000 | 0.0000000 | 0.0000000  |
| F  | 0.0000000 | 0.0000000 | 1.3918334  |
| F  | 0.0000000 | 0.0000000 | -1.3918334 |

### Vibrational frequencies:

| mode | symmetry | wave number | IR intensity | selection rules |
|------|----------|-------------|--------------|-----------------|
|      |          | cm**(-1)    | km/mol       | IR RAMAN        |
| 1    |          | 0.00        | 0.00000      | - -             |
| 2    |          | 0.00        | 0.00000      | - -             |
| 3    |          | 0.00        | 0.00000      | - -             |
| 4    |          | 0.00        | 0.00000      | - -             |
| 5    |          | 0.00        | 0.00000      | - -             |
| 6    | e1u      | 334.15      | 142.25521    | YES NO          |
| 7    | e1u      | 334.15      | 142.25521    | YES NO          |
| 8    | a1g      | 694.81      | 0.00000      | NO YES          |
| 9    | a2u      | 1510.45     | 351.33301    | YES NO          |
